# Supplementary material
Source: Research Square preprint supplement (doi:10.21203/rs.3.rs-9490147/v1)
Supplement: Supplementary file 1 [file c57bfd45b57f0923f83a1ea9.docx]

**Genetic Engineering of Umbilical MSCs Co-Expressing PD-1 and HSV-1-TK for Immune Activation and Tumor Eradication**

**Supplementary material and methods**

***Proliferation effect of UMSC/PD-1-TK (UPT) w/wo GCV***

Engineered umbilical mesenchymal stem cells (UMSCs) were initially seeded into a 96-well plate at a density of 1000 cells per well and allowed to incubate overnight. At specific time points (0, 24, 48, and 72 hours), the cells underwent a reaction with a 0.5 mg/mL MTT solution, leading to the formation of formazan within a 4-hour incubation period. Following this, the supernatant was carefully discarded, and the formazan crystals were subsequently dissolved using 100 µL of dimethyl sulfoxide (DMSO) with a 5-minute shaking duration. Absorbance readings for all wells were then taken at a wavelength of 570 nm. The proliferation fold change was determined using the formula: *Proliferation Fold Change = Absorbance at 570 nm (O.D.) at 24, 48, or 72 hours/Absorbance at 570 nm (O.D.) at 0 hours.* This calculation provides a quantitative measure of the relative proliferation rates at different time points, highlighting changes in cellular activity over the specified intervals.

***Suicide effect of UPT with GCV***

To investigate the cytotoxicity effect in vitro, the suicide ability of UPT plus GCV was analyzed. After cells were seeded in a 96-well plate overnight, various dosages of ganciclovir (GCV) (0.1, 1, 10, and 100 μg/mL) were added to each well every day for 7 consecutive days. Cell viability was evaluated using the MTT assay (Invitrogen), and Annexin-V stainied was imaged by a IncuCyte S3 System (Sartorius Campus, Goettingen, Germany).

***Bystander effect of UPT with GCV***

UPT (1×104 cells) were seeded in the top chamber of a transwell, and A549 or LLC cells were seeded in the bottom chamber of the transwell at a 1:3 ratio for 24 hours. GCV at 100 μg/mL was administered to the chamber simultaneously. After 24 hours of co-culture, A549 and LLC cells were collected and stained with Propidium Iodide (2 μg/mL) and Annexin-V (5 μL/sample) for apoptosis analysis using the NovoCyte Flow Cytometer System.

***Western blotting***

To assess the expression of PD-1 and HSV-TK in UMSCs, we initiated the process by collecting cells from parental UMSCs, UMSC/*PD-1* (UP), UMSC/*TK* (UT), and UMSC/*PD-1-TK* (UPT), for total protein extraction. For cell lysis, all cell types were treated with RIPA buffer contained with proteinase and phosphatase inhibitors. Subsequently, the total proteins were separated using a 10% SDS-PAGE gel and transferred onto a PVDF membrane at 90V for 100 minutes. These transferred PVDF membranes were then subjected to blocking in a 3% BSA solution within TBS-T buffer for 1 hour. Next, the membranes were incubated with primary antibodies, specifically anti-PD-1 (UM800091, Origene, MD, USA) and anti-HSV-TK (PA5-67984, Invitrogen, MA, USA), followed by HRP-conjugated secondary antibodies (anti-mouse and anti-rabbit). To visualize the protein bands of interest, the membranes were exposed to an ECL solution for 2 minutes, and the expressions of the target proteins were detected using a UVP ChemStudio system (Analytik Jena, Jena, Germany). For quantification of the protein band expressions, we employed the VisionWorks System (Analytik Jena).

***Flow cytometry (PD-1 detection)***

To assess the expression of PD-1 and in UMSCs, we initiated the process by collecting cells from parental UMSCs, UP, UT, and UPT, for surface PD-1 detection. For surface PD-1 staining, all cell types were gently detached and harvested using Accutase. Subsequently, a count of 1 x 10^6 cells was performed, and the cells were pelleted with 200 rcf for 5 minutes at 4 degrees Celsius. Pelleted cells were the resuspended with staining buffer (1% BSA in PBS) contained with Alexa Fluor® 647 Mouse anti-Human CD279 (PD-1) (560838, BD, NJ, USA) and incubated for 15 minutes at 4 degrees Celsius, protected from light. To detect the expression of PD-1 on the cells, the stained cells were detected using APC channel of NovoCyte Flow Cytometer Systems (Agilent, CA, USA).

***LLC sphere and UPT co-culture assay***

LLC cells were seeded in ultra-low attachment 24-well plates with 1x104 cells/well. After tumor spheres formed (5 days), UMSC and UMSC/*PD-1-TK* cells were cultured and stained with CSFE at 37 degrees Celsius for 15 min protected from light. Then stained UMSC and UMSC/*PD-1-TK* cells were loaded into ultra-low attachment 24-well plates content LLC tumor spheres with 1x105 cells/well. After overnight incubation, spheres were fixed with 4% paraformaldehyde and stained with PD-L1 primary antibody and DAPI.

**PBMC co-culture with UMSC**

To assess whether UMSC influence the activation of T cells, we co-cultured human PBMCs (peripheral blood mononuclear cells) with UMSC. We employed flow cytometry to examine the activation of GranzymeB+/CD8+ T cells, CD4+ T cells, nature killer cells (NK, CD3-/CD8+/CD56+) and central memory T cells (CD8+/CD44+/CD62L+). The UMSCs, UP and UPT (5 x104) were seeding in transwell (Coring® Transwell, Costar 6 well plate). The PBMC (5 × 105) were re-suspended in 1 ml RPMI-1640 medium content 10% FBS and placed in the lower chamber. The PBMC were supply CD3/CD28 T cell activator (STEMCELL, Canada) 25 µl/ml of cells for CD4 and CD8 T cell activation. The PBMC co-culture with UMSC for 7 days. After incubation, using flow cytometry to analyze CD4 and CD8 T cell activation .

**THP-1, mouse bone marrow-derived macrophages (BMDM) and human PBMC differentiation, macrophage priming, and macrophage polarization**

To induce macrophage polarization, THP-1, BMDM and human PBMC were cultured in the presence of 20 ng/ml M-CSF (Sino Biological) for 7 days and 14 days, respectively. Subsequently, they were polarized into M1 macrophages using 20 ng/ml IFN-γ (Sino Biological) or M2 macrophages with 20 ng/ml IL-13 (Sino Biological) and 20 ng/ml IL-4 (Sino Biological) for an additional 3 days. After differentiating THP-1, BMDMs and PBMCs into M1 and M2 macrophages, they were co-cultured with UMSCs or UPT for 3 days. Post-culture, the M1 and M2 macrophage markers were assessed, with CD86 indicating M1 and CD206 indicating M2.

***Radiolabeling of 125I-FIAU***

To prepare 125I-FIAU, mix 4 µg of FIAU precursor with 350 µCi 125I in an oxidant solution containing H₂O₂, HCl, and H₂O, reaching a total volume of 200 µL. Incubate the mixture at room temperature for 20 minutes with continuous shaking at 500 rpm using a thermal controller. After incubation, add 100 µL of a reductant solution containing Na₂S₂O₃, NaOH, and H₂O. The resulting radiolabeled product does not require further purification. The quality of the 125I-FIAU radiolabeling is assessed using instant thin-layer chromatography (iTLC). Then, the radiolabeled product is applied onto silica gel-impregnated glass microfiber chromatography paper and developed using a mobile phase composed of ethyl acetate and ethanol (9:1 ratio). The chromatographic sheets are then scanned using a radioactive scanner (AR-2000 radio-TLC Imaging Scanner, Bioscan, France) to analyze the radiochemical properties. The relative front (Rf) value is determined by calculating the ratio of the distance traveled by the radiolabeled component to the distance traveled by the solvent front. This value ensures the quality and consistency of the radiolabeled compound.

***Biodistribution analysis of 125I-FIAU for labeling HSV-1-TK***

For radiolabeling, suspend the UMSC/*PD-1-TK* in 125I-FIAU and incubate under standard conditions. After incubation, discard the medium, wash the cells with PBS, and detach them using 0.5× trypsin for 3 minutes. Seven days after LLC engraftment, PD-1-TK-MSC (1×107 cells per kilogram of mouse) was injected intravenously into both tumor-bearing and non-tumor-bearing mice on day 1. Two days later, GCV (75 mg per kg) was injected intravenously into half of each group on days 3, 4, and 5. On day 1, four hours post-PD-1-TK-MSC injection, 125I-FIAU (150 µCi in 100 µL) was administered, followed by nano-SPECT/CT scans. Additional nano-SPECT/CT scans were performed on days 6 and 7. On day 8, the mice were sacrificed using CO2, and organs such as the brain, liver, lung, spleen, kidney, and testes were harvested for biodistribution analysis. After tissue collection, excised organs are weighed and analyzed for radioactivity using a gamma counter (Hidex Automatic Gamma Counter, Hidex Oy, Finland). The measured activity in each tissue is expressed as the percentage of the injected dose per gram of tissue (%ID/g). For comparison, a control group of normal mice (n=3-4) undergoes the same procedure to establish baseline values.

***Biodistribution analysis of DiR labeled UMSCs***

UMSC and UMSC/*PD-1-TK* cells were labeled with XenoLight DiR (320 µg/mL), a near-infrared fluorescent dye. Mice, with or without LLC*luc2* inoculation for 14 days, were divided into three groups: vehicle, UMSCs, and UMSC/PD-1-TK. One million labeled cells were intravenously injected into each mouse. The vehicle group of mice did not receive NSCLC inoculation but were injected with DiR-labeled UMSCs, similar to the UMSCs group. Fluorescence imaging was performed at 1, 4, 24, 72, 120, and 144 hours post-injection to track cell migration and accumulation. Imaging sessions were conducted under anesthesia to minimize movement and ensure consistent, high-quality data collection. Additionally, another group of mice was sacrificed at 96, 120, and 144 hours for the collection of heart, lung, liver, spleen, and kidneys, followed by *ex vivo* fluorescence scanning to assess organ distribution.

***Immunohistochemical (IHC) staining***

Tumor sections extracted from mice were embedded and sliced into 50 µm sections. IHC staining was performed using the IHC Select® HRP/DAB staining kit (DAB500, Millipore) following the manufacturer's protocol. Antibodies used for flow cytometry are listed in Supplementary Table 3.

***Hematoxylin and eosin (H&E) staining***

Sections of the brain, thyroid, lung, heart, skin, liver, stomach, pancreas, spleen, small intestine, kidney, muscle, lymph node, bladder, and testicle embedded in Parafilm were processed using the H&E staining protocol outlined by Feldman et al.

**Supplementary results**

**
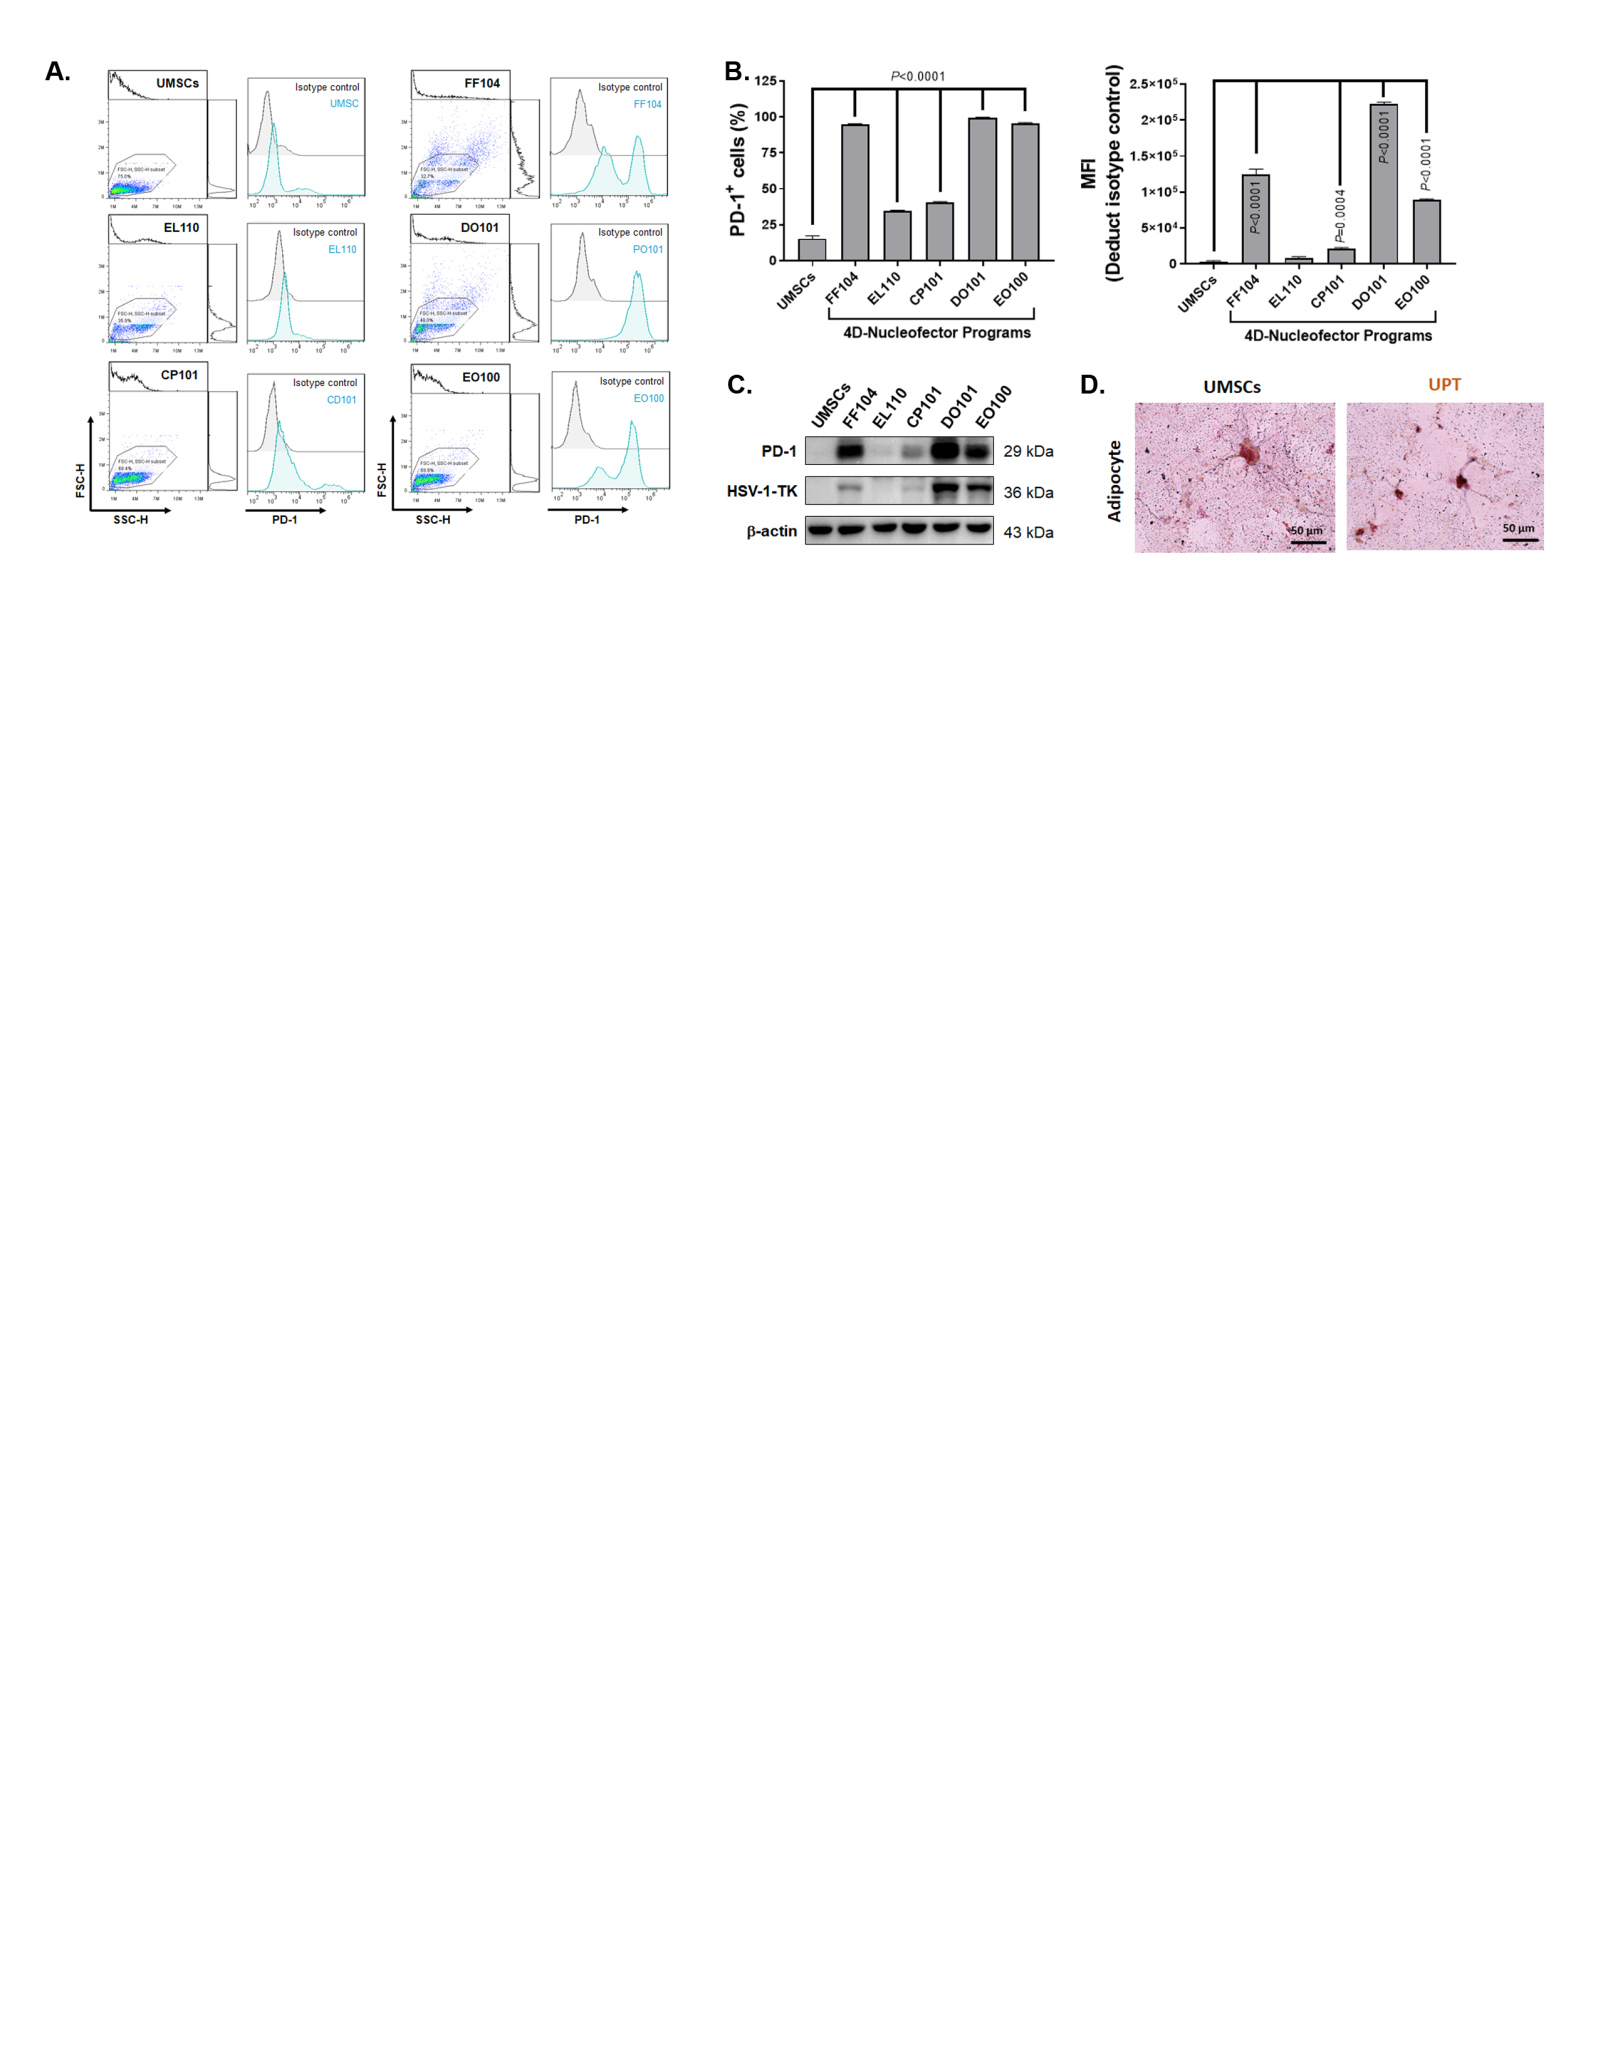
**

**Supplementary figure 1. The optimization of electroporation on UMSCs.** (A-B) PD-1 expression and its quantification results assayed by flow cytometry. (C) The protein expression of PD-1 and HSV-1-TK in UMSCs under different electroporation conditions with PD-1 and HSV-1-TK genes. (D) Adipocyte differentiation results of UMSCs and UPT.


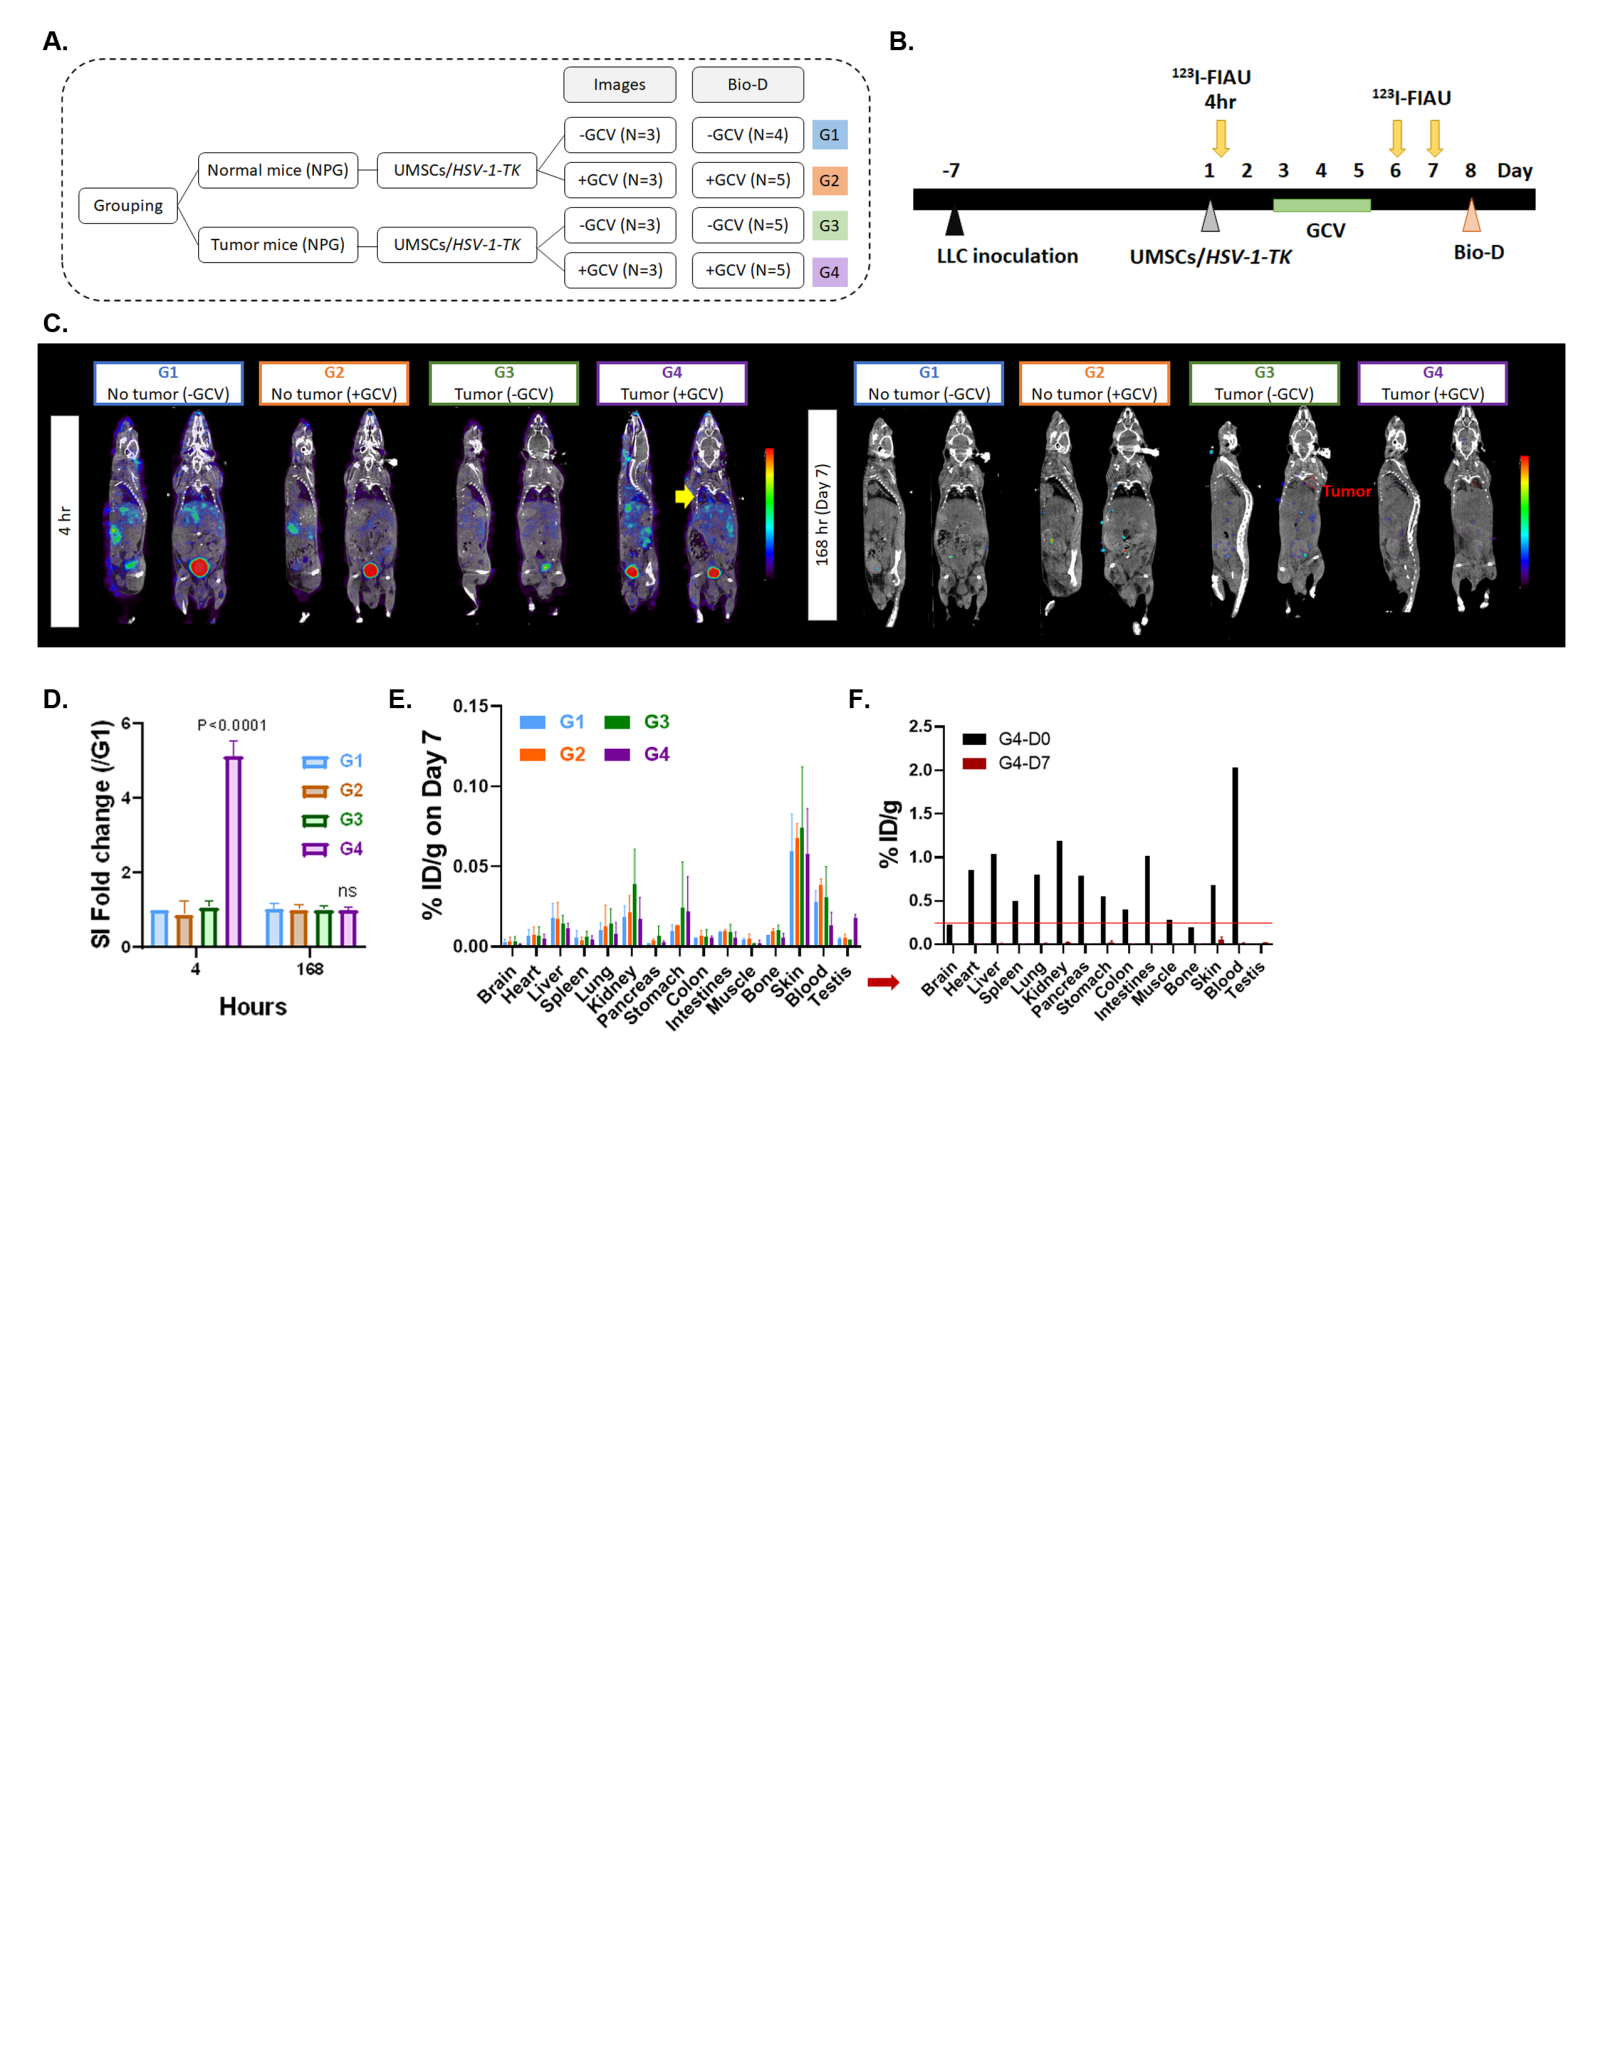


**Supplementary figure 2. The biodistribution of UT after combined with GCV.** (A) Grouping and (B) experiment flow chart of biodistribution of UT on NPG mice. (C) SPECT scan data of each group on day 0 (4 hr) and day 7 (168 hr) and (D) their quantification results were presented. (E) Biodistribution of UPT on different organs in all groups on day 7. (F) Biodistribution of UPT in group 4 on day 0 and 7.


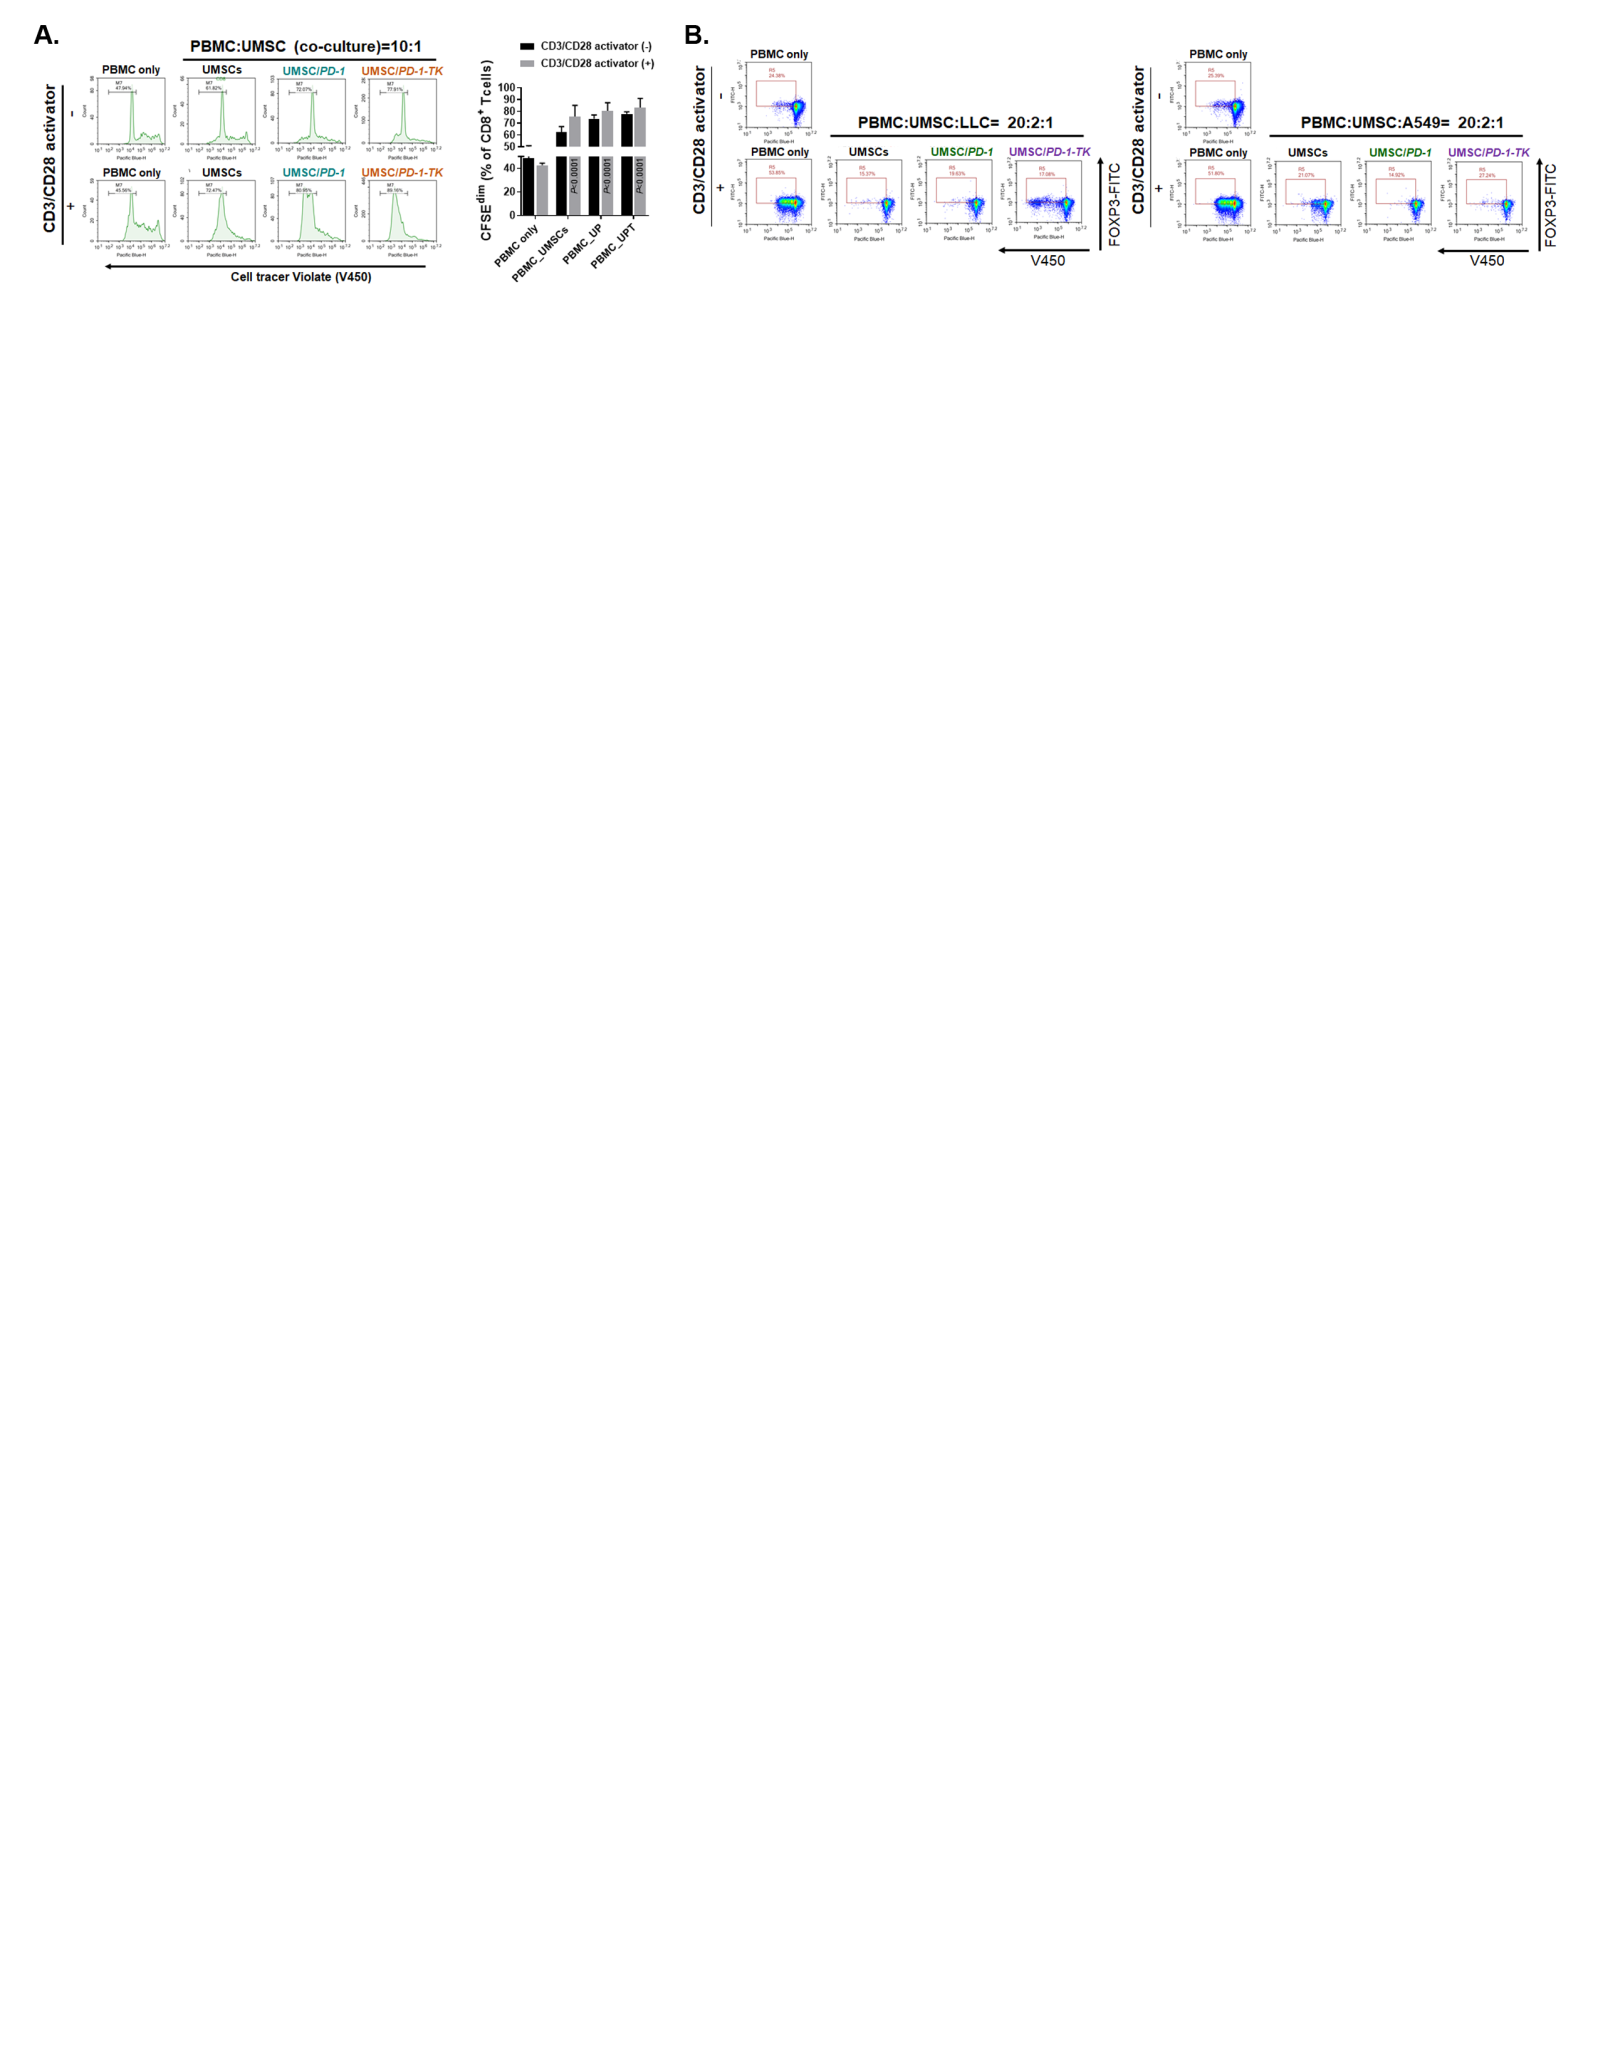


**Supplementary figure 3. *Ex vivo* immunoregulation of GE-MSCs under different co-culture system.** Proliferation pattern of (A) CD8+ CTLs and (B) CD4+FOXP3+ cells in PBMCs that co-culture with UMSC, UP or UPT.


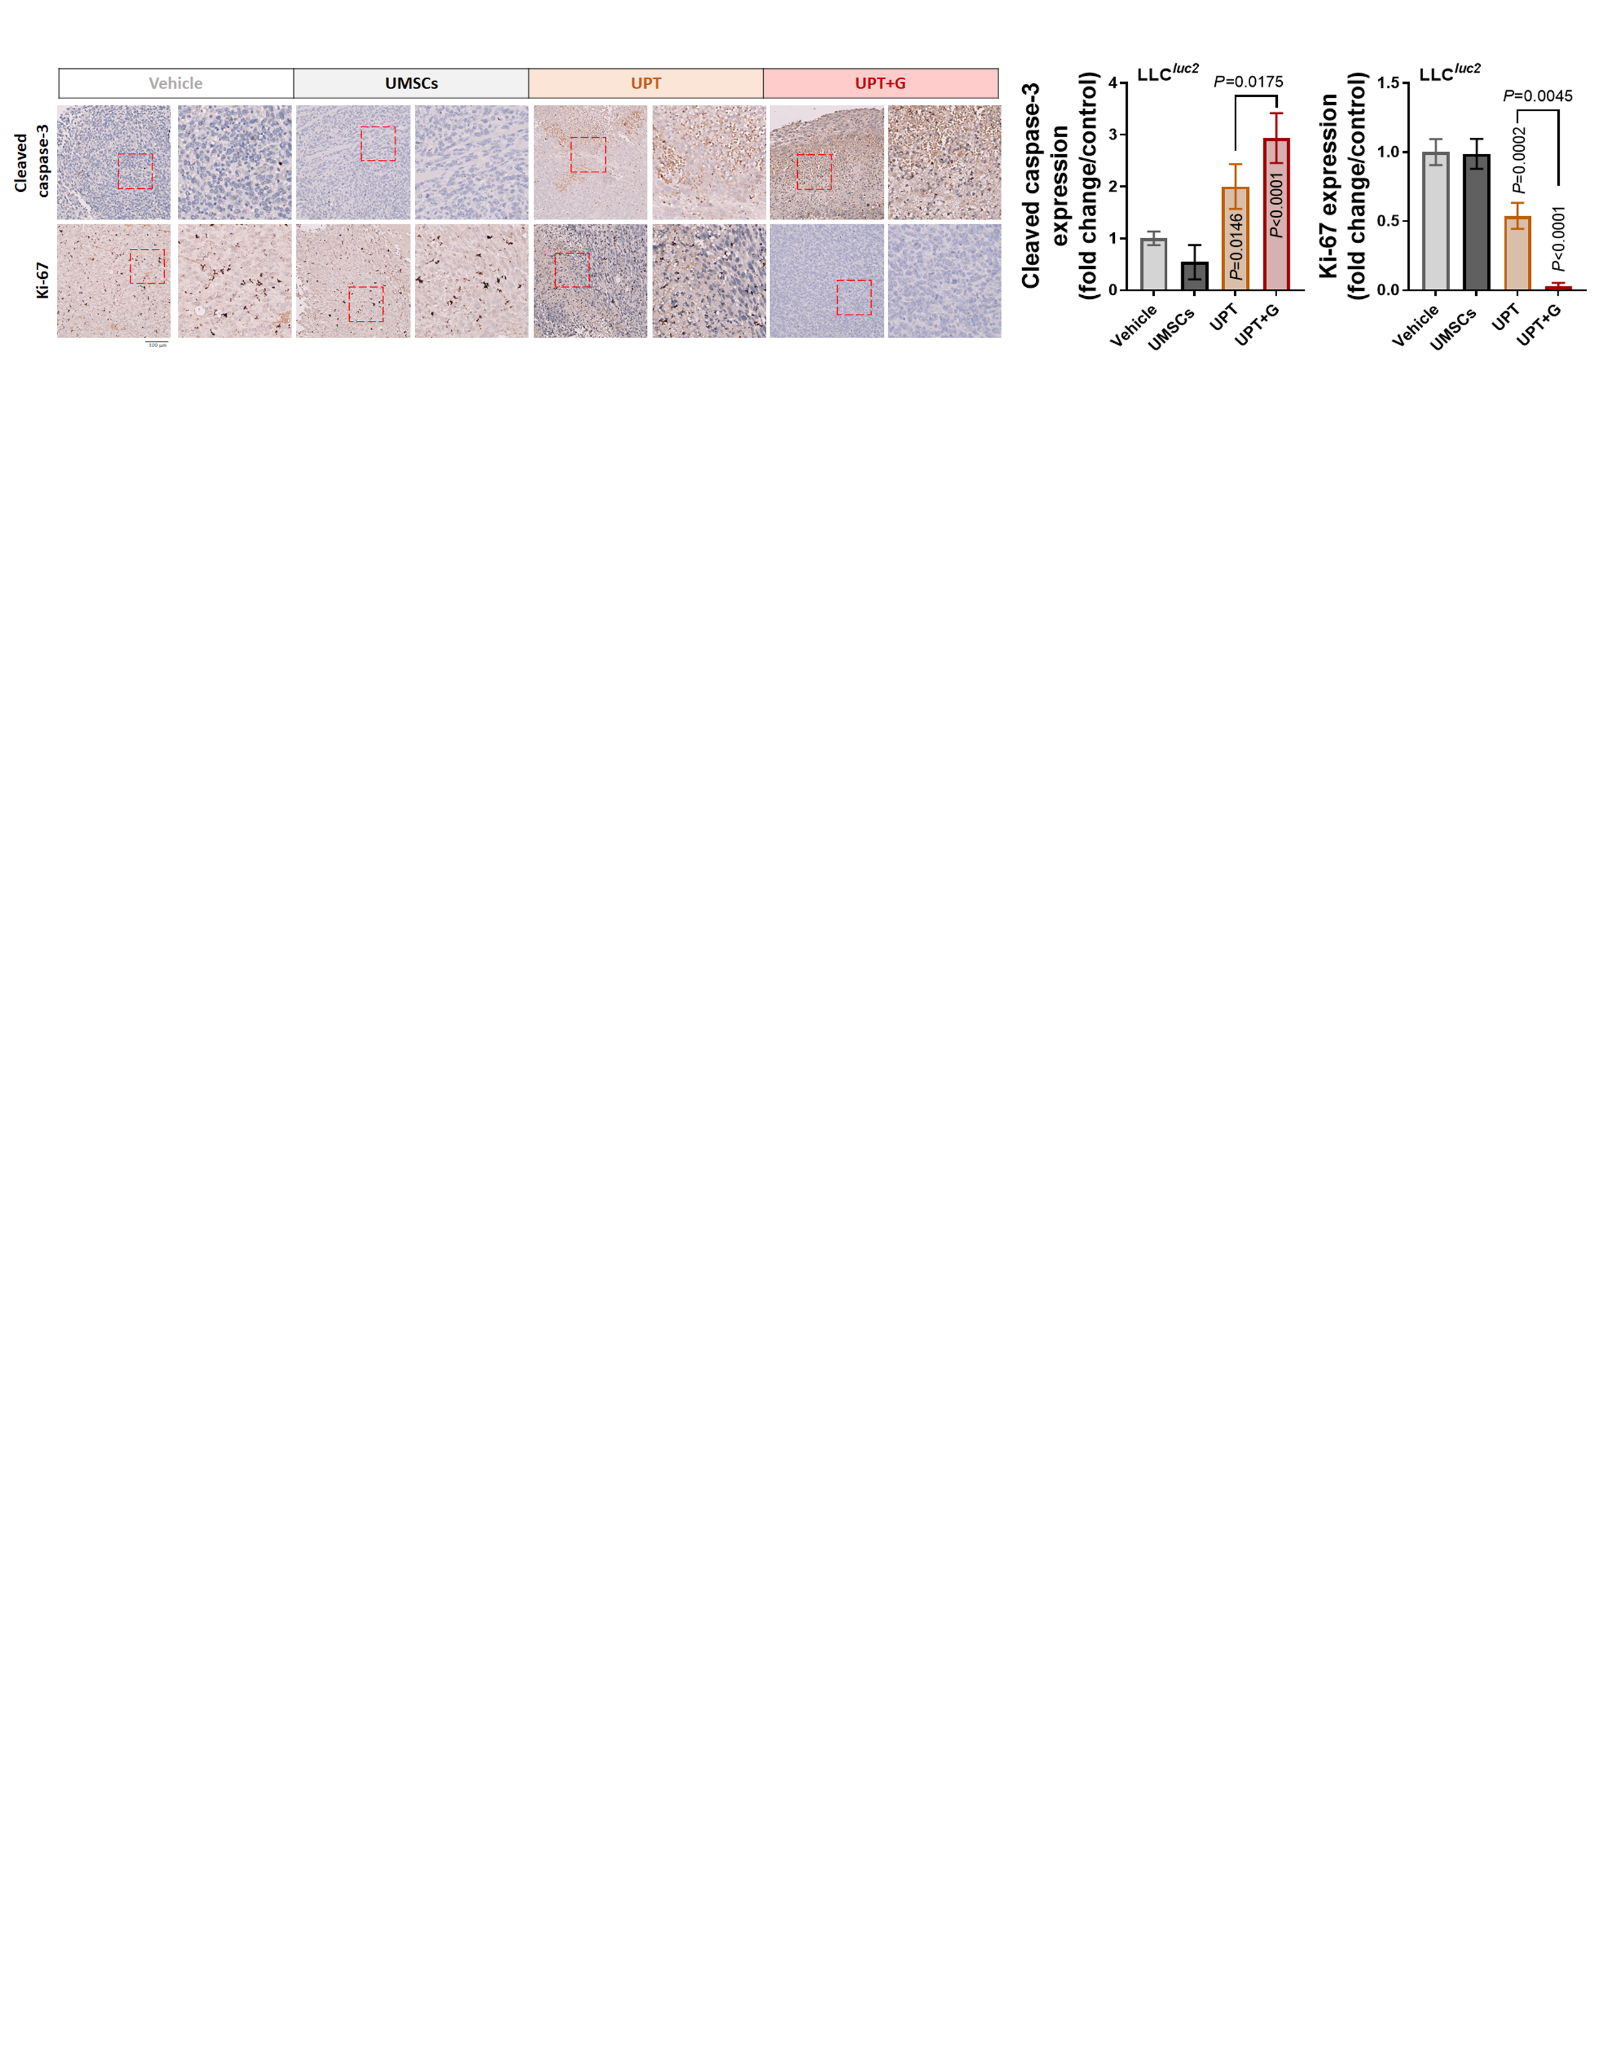


**Supplementary figure 4. *In vivo* tumor suppression of GE-MSCs on LLC tumor tissue by IHC staining.**


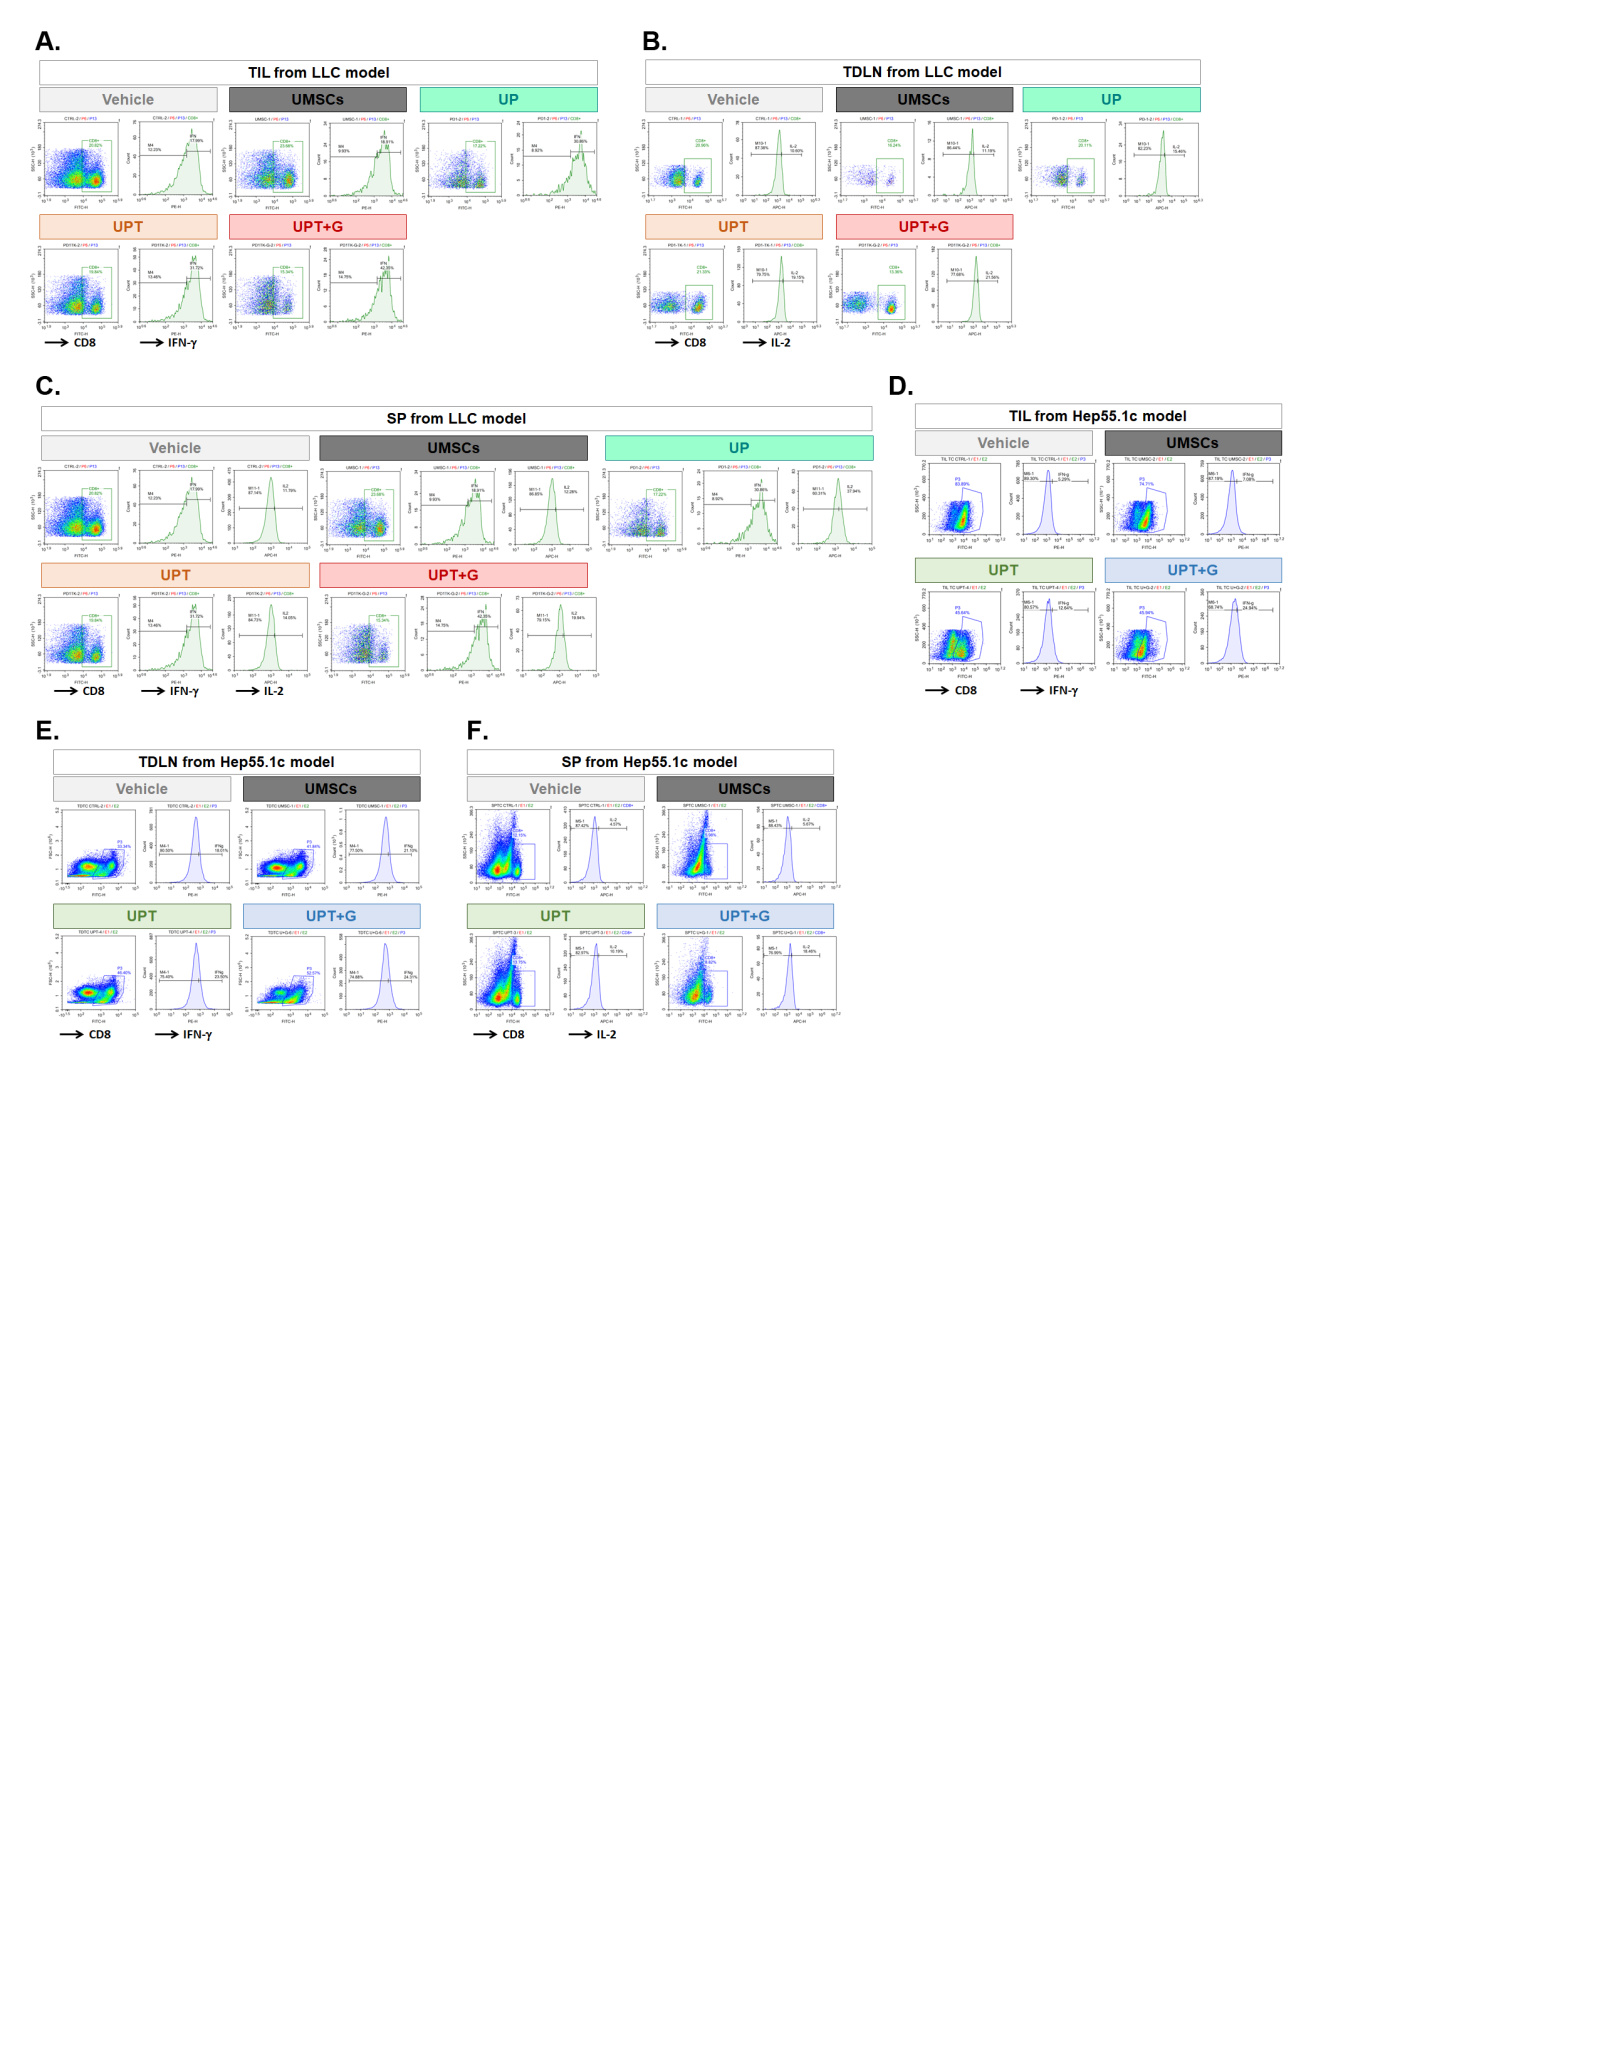


**Supplementary figure 5. *In vivo* immunoregulation on CTLs of GE-MSCs in LLC and Hep55.1c bearing model.** Expression pattern of (A) CD8+IFN-+ CTLs in TIL, (B) CD8+IL-2+ CTLs in TDLN and (C) CD8+IFN-+ IL-2+ CTLs in SP in LLC model were presented. Expression pattern of (D) CD8+IFN-+ CTLs in TIL, (E) CD8+IFN-+ CTLs in TDLN and (F) CD8+IL-2+ CTLs SP in Hep55.1c model were presented.


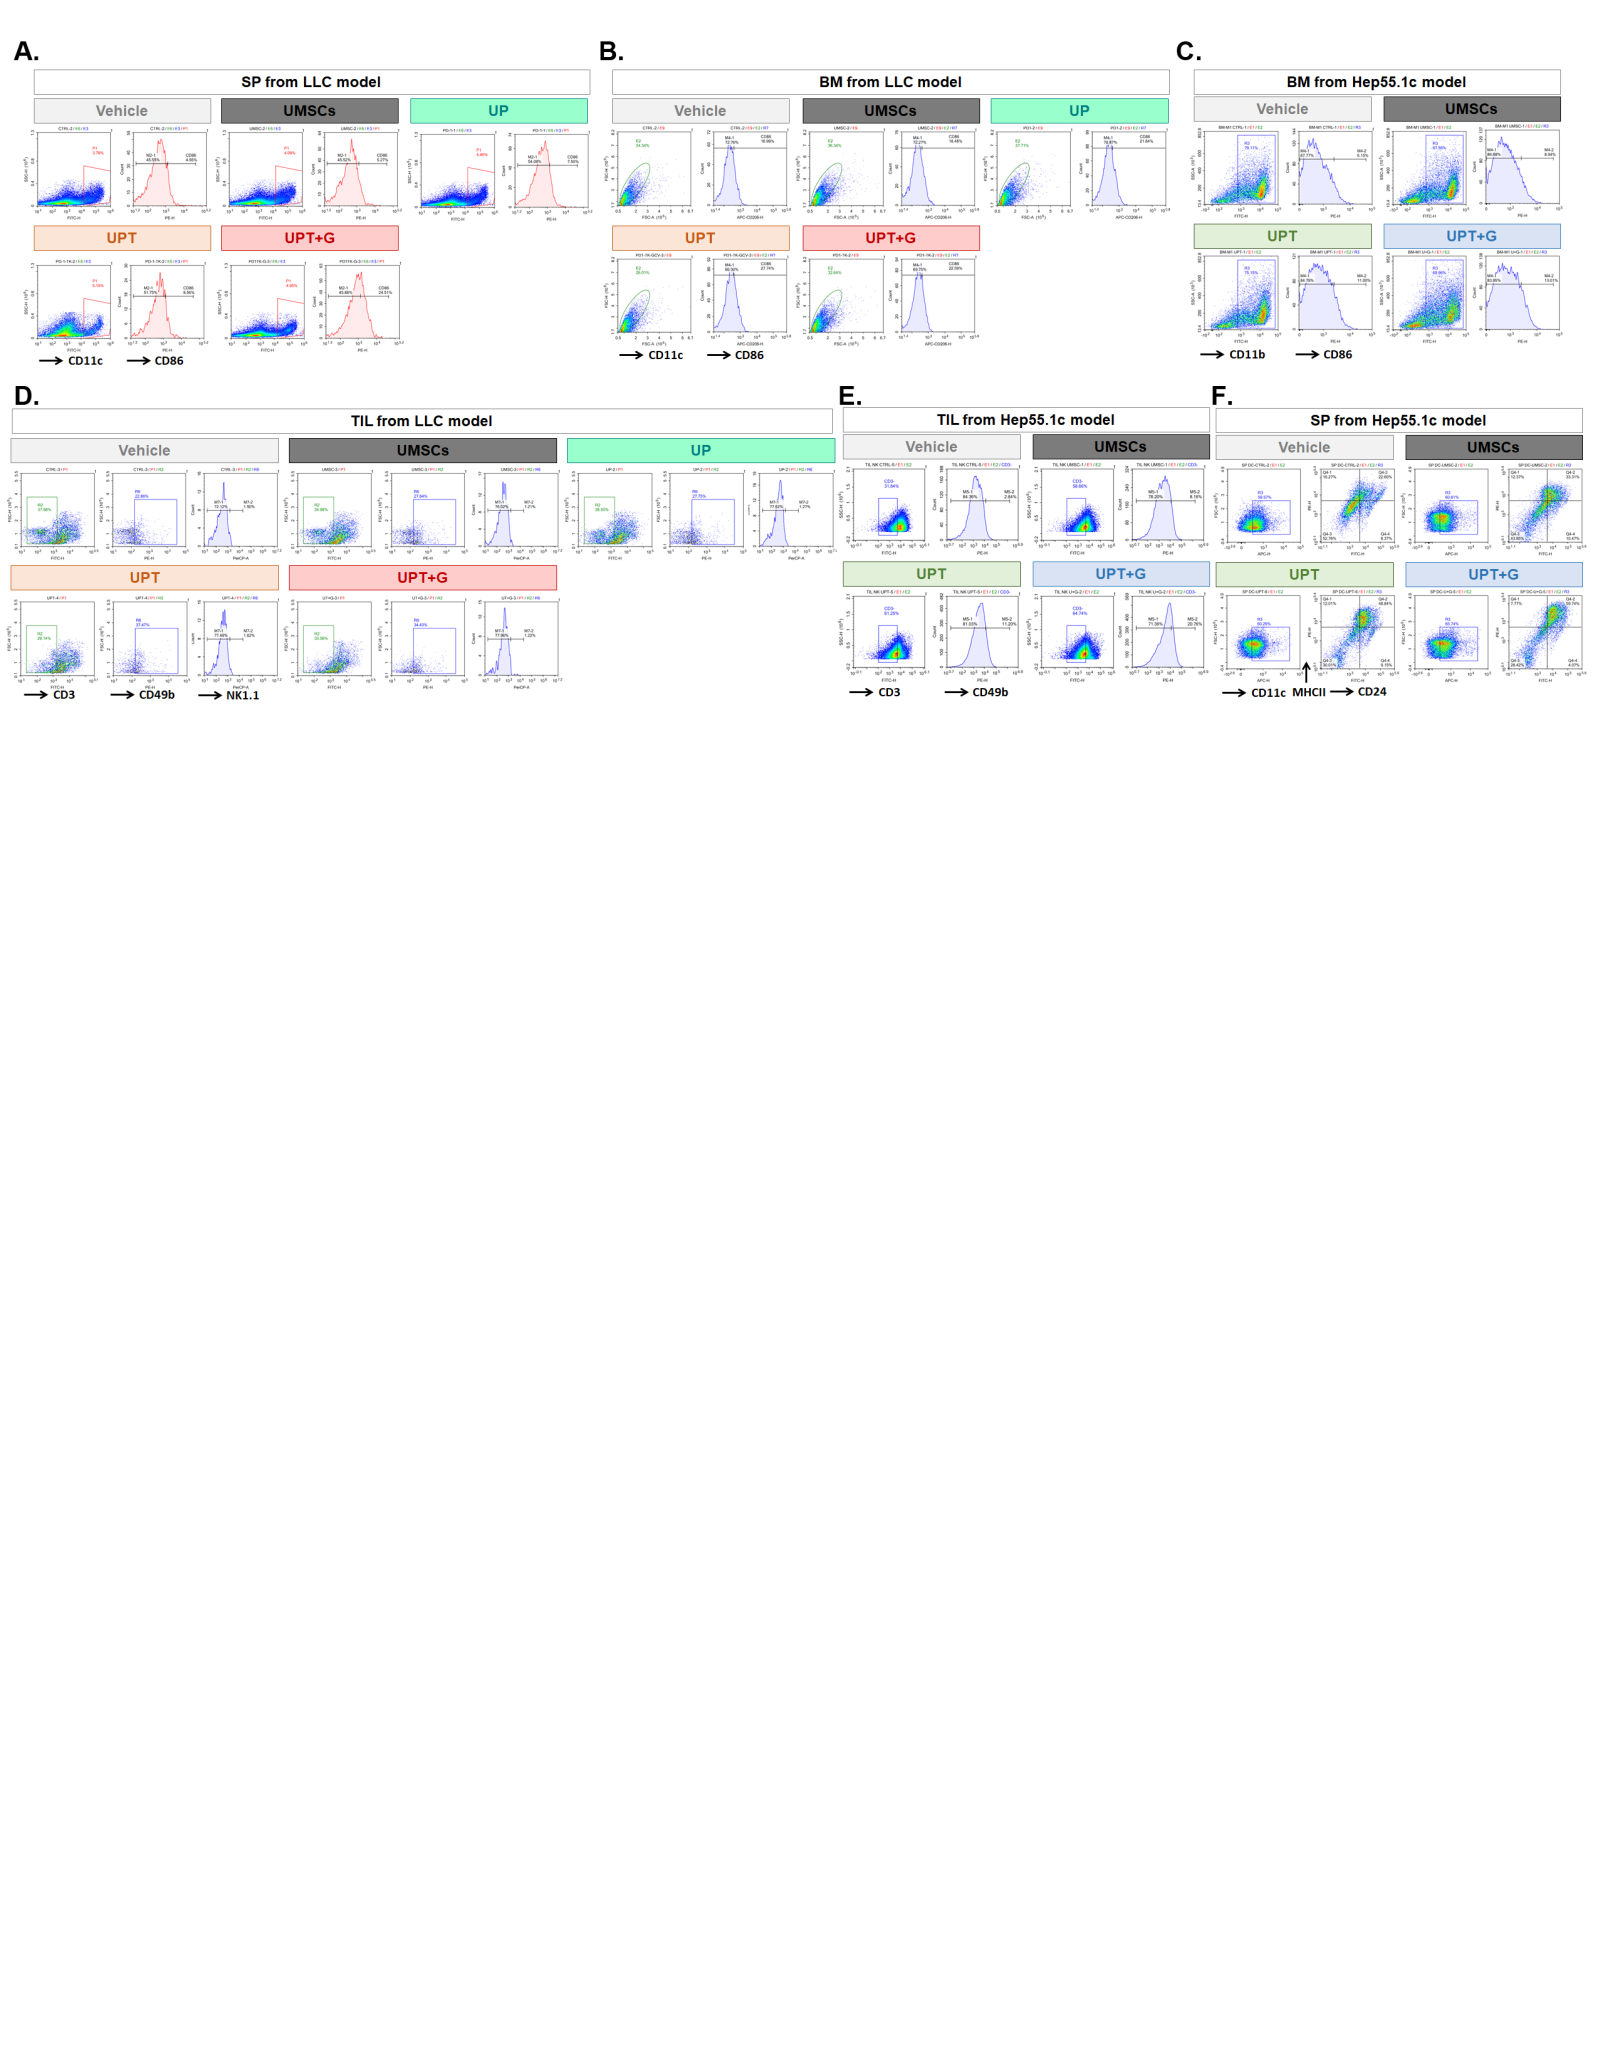


**Supplementary figure 6. *In vivo* immunoregulation of GE-MSCs on M1, NK cells and DCs in LLC and Hep55.1c bearing model.** Expression pattern of CD11b+CD86+ M1 in (A) SP, and (B) BM in LLC model and CD11b+CD86+ M1 in (C) BM in Hep55.1c model were presented. (D-E) Expression pattern of CD3-CD49b+NK1.1+ NK cells in TIL and (F) CD11c+CD24+MHCII+ DCs in SP and in LLC or Hep55.1c model were presented.


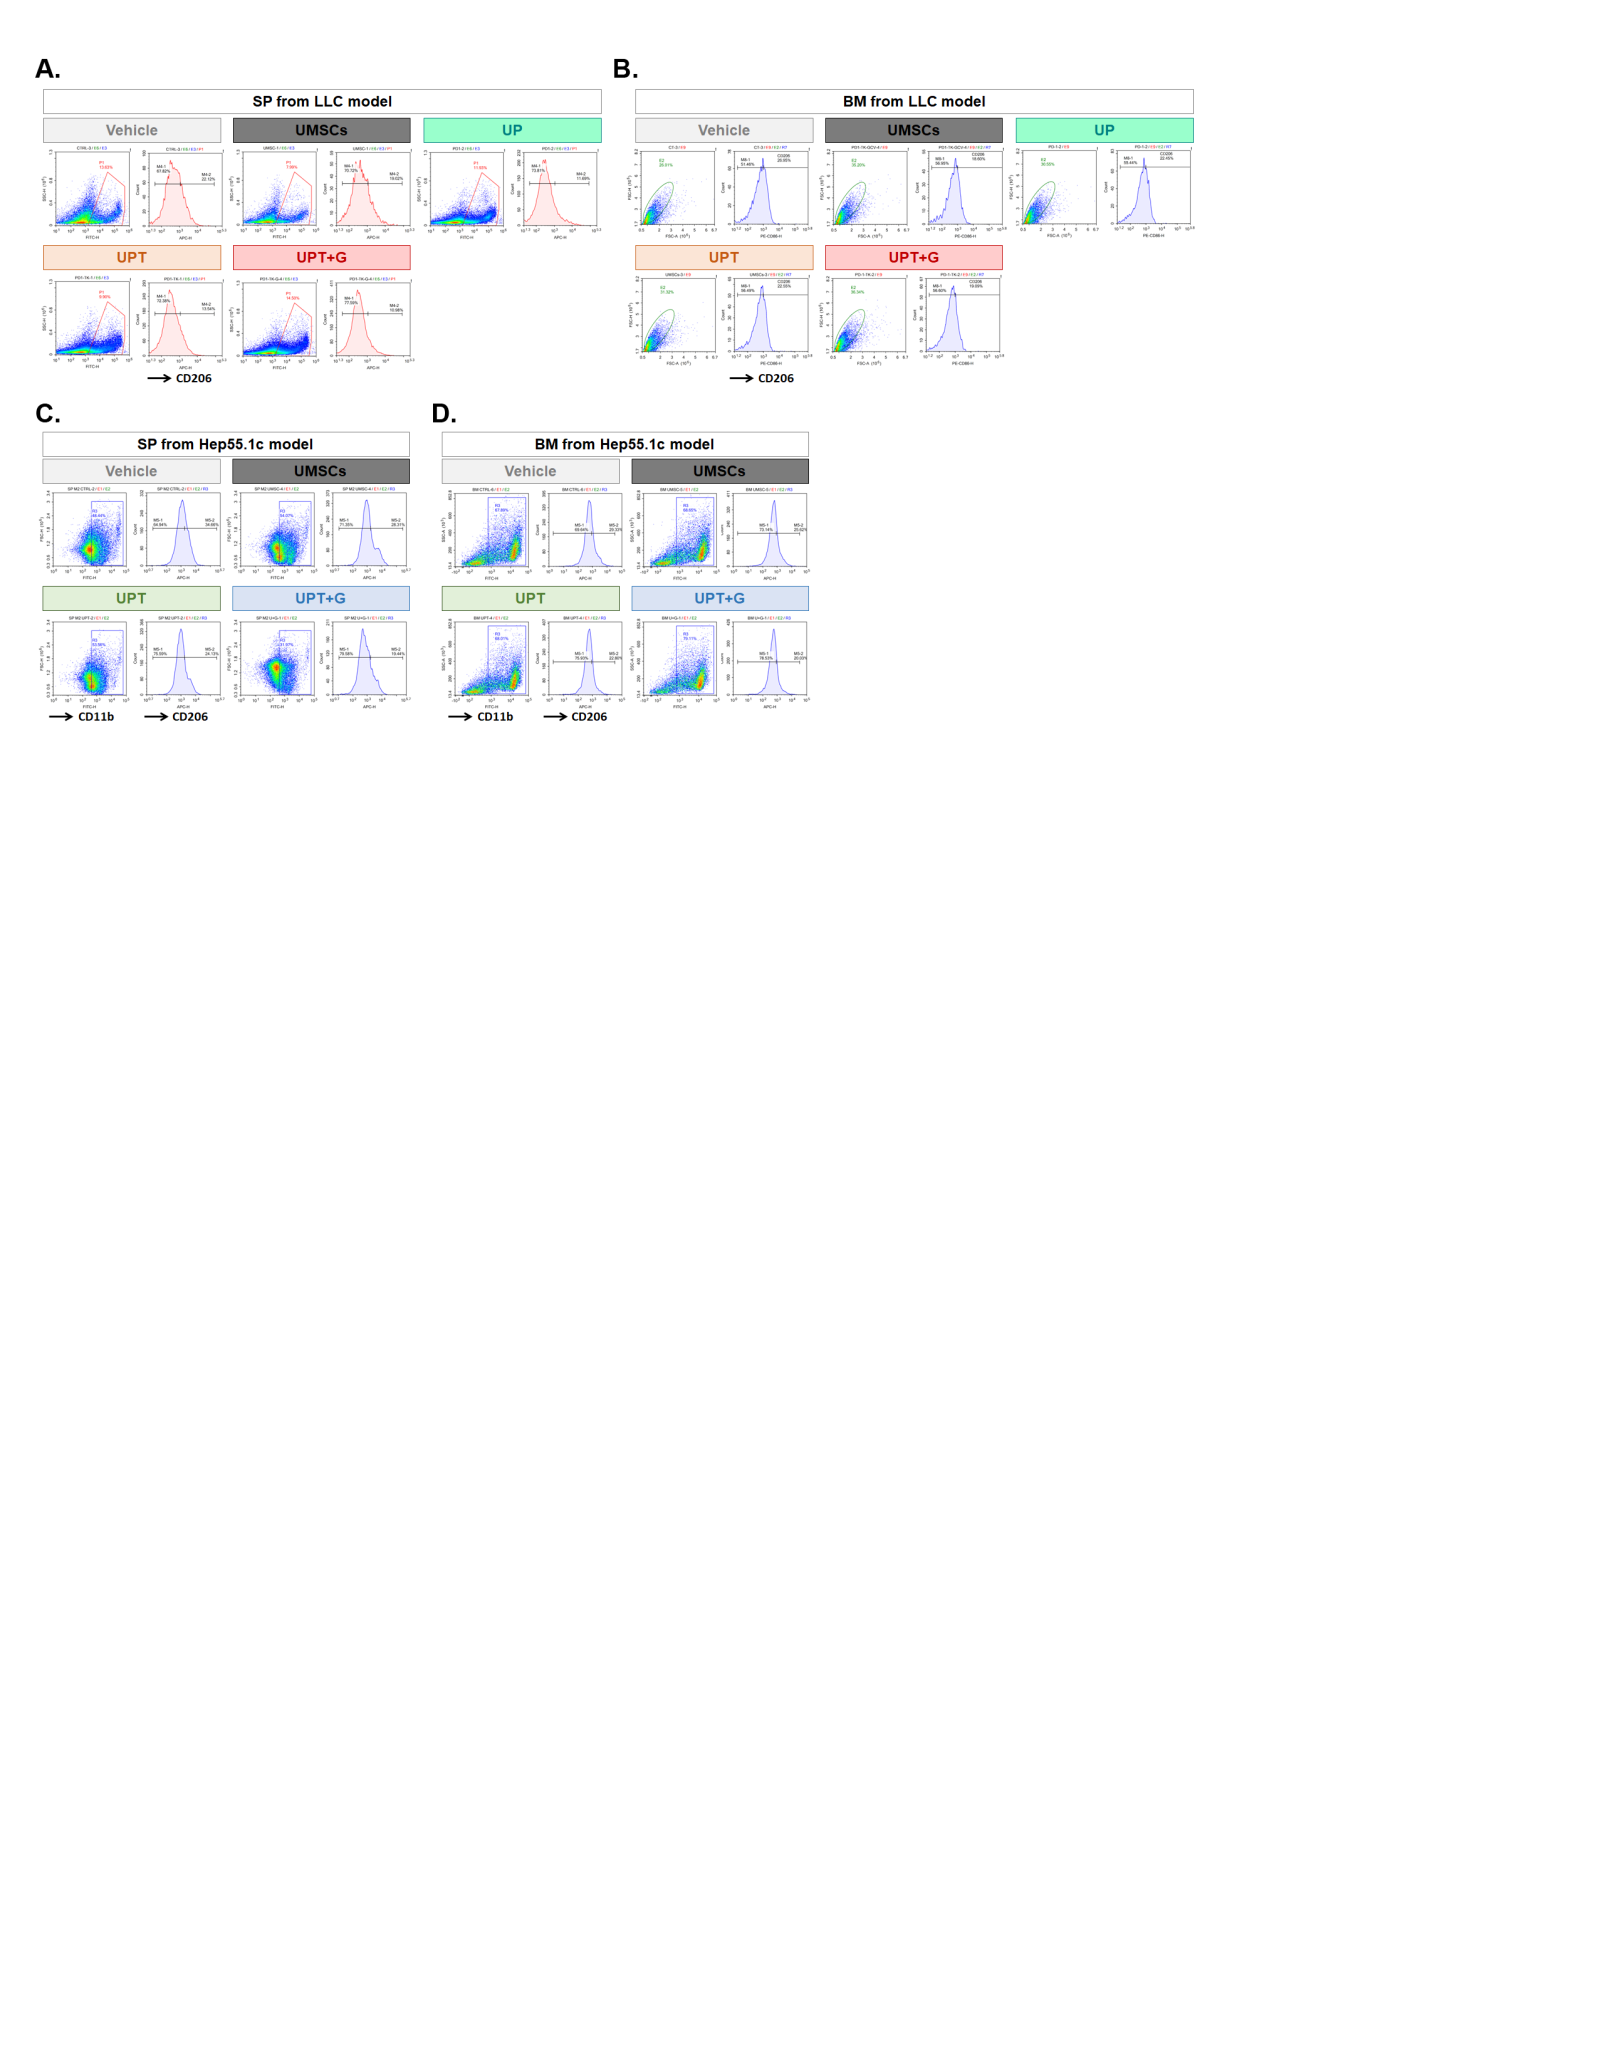


**Supplementary figure 7. *In vivo* immunoregulation of GE-MSCs on M2 and NK cells in LLC and Hep55.1c bearing model.** Expression pattern of CD11b+CD206+ M2 in (A, C) SP, and (B, D) BM in LLC or Hep55.1c model were presented.


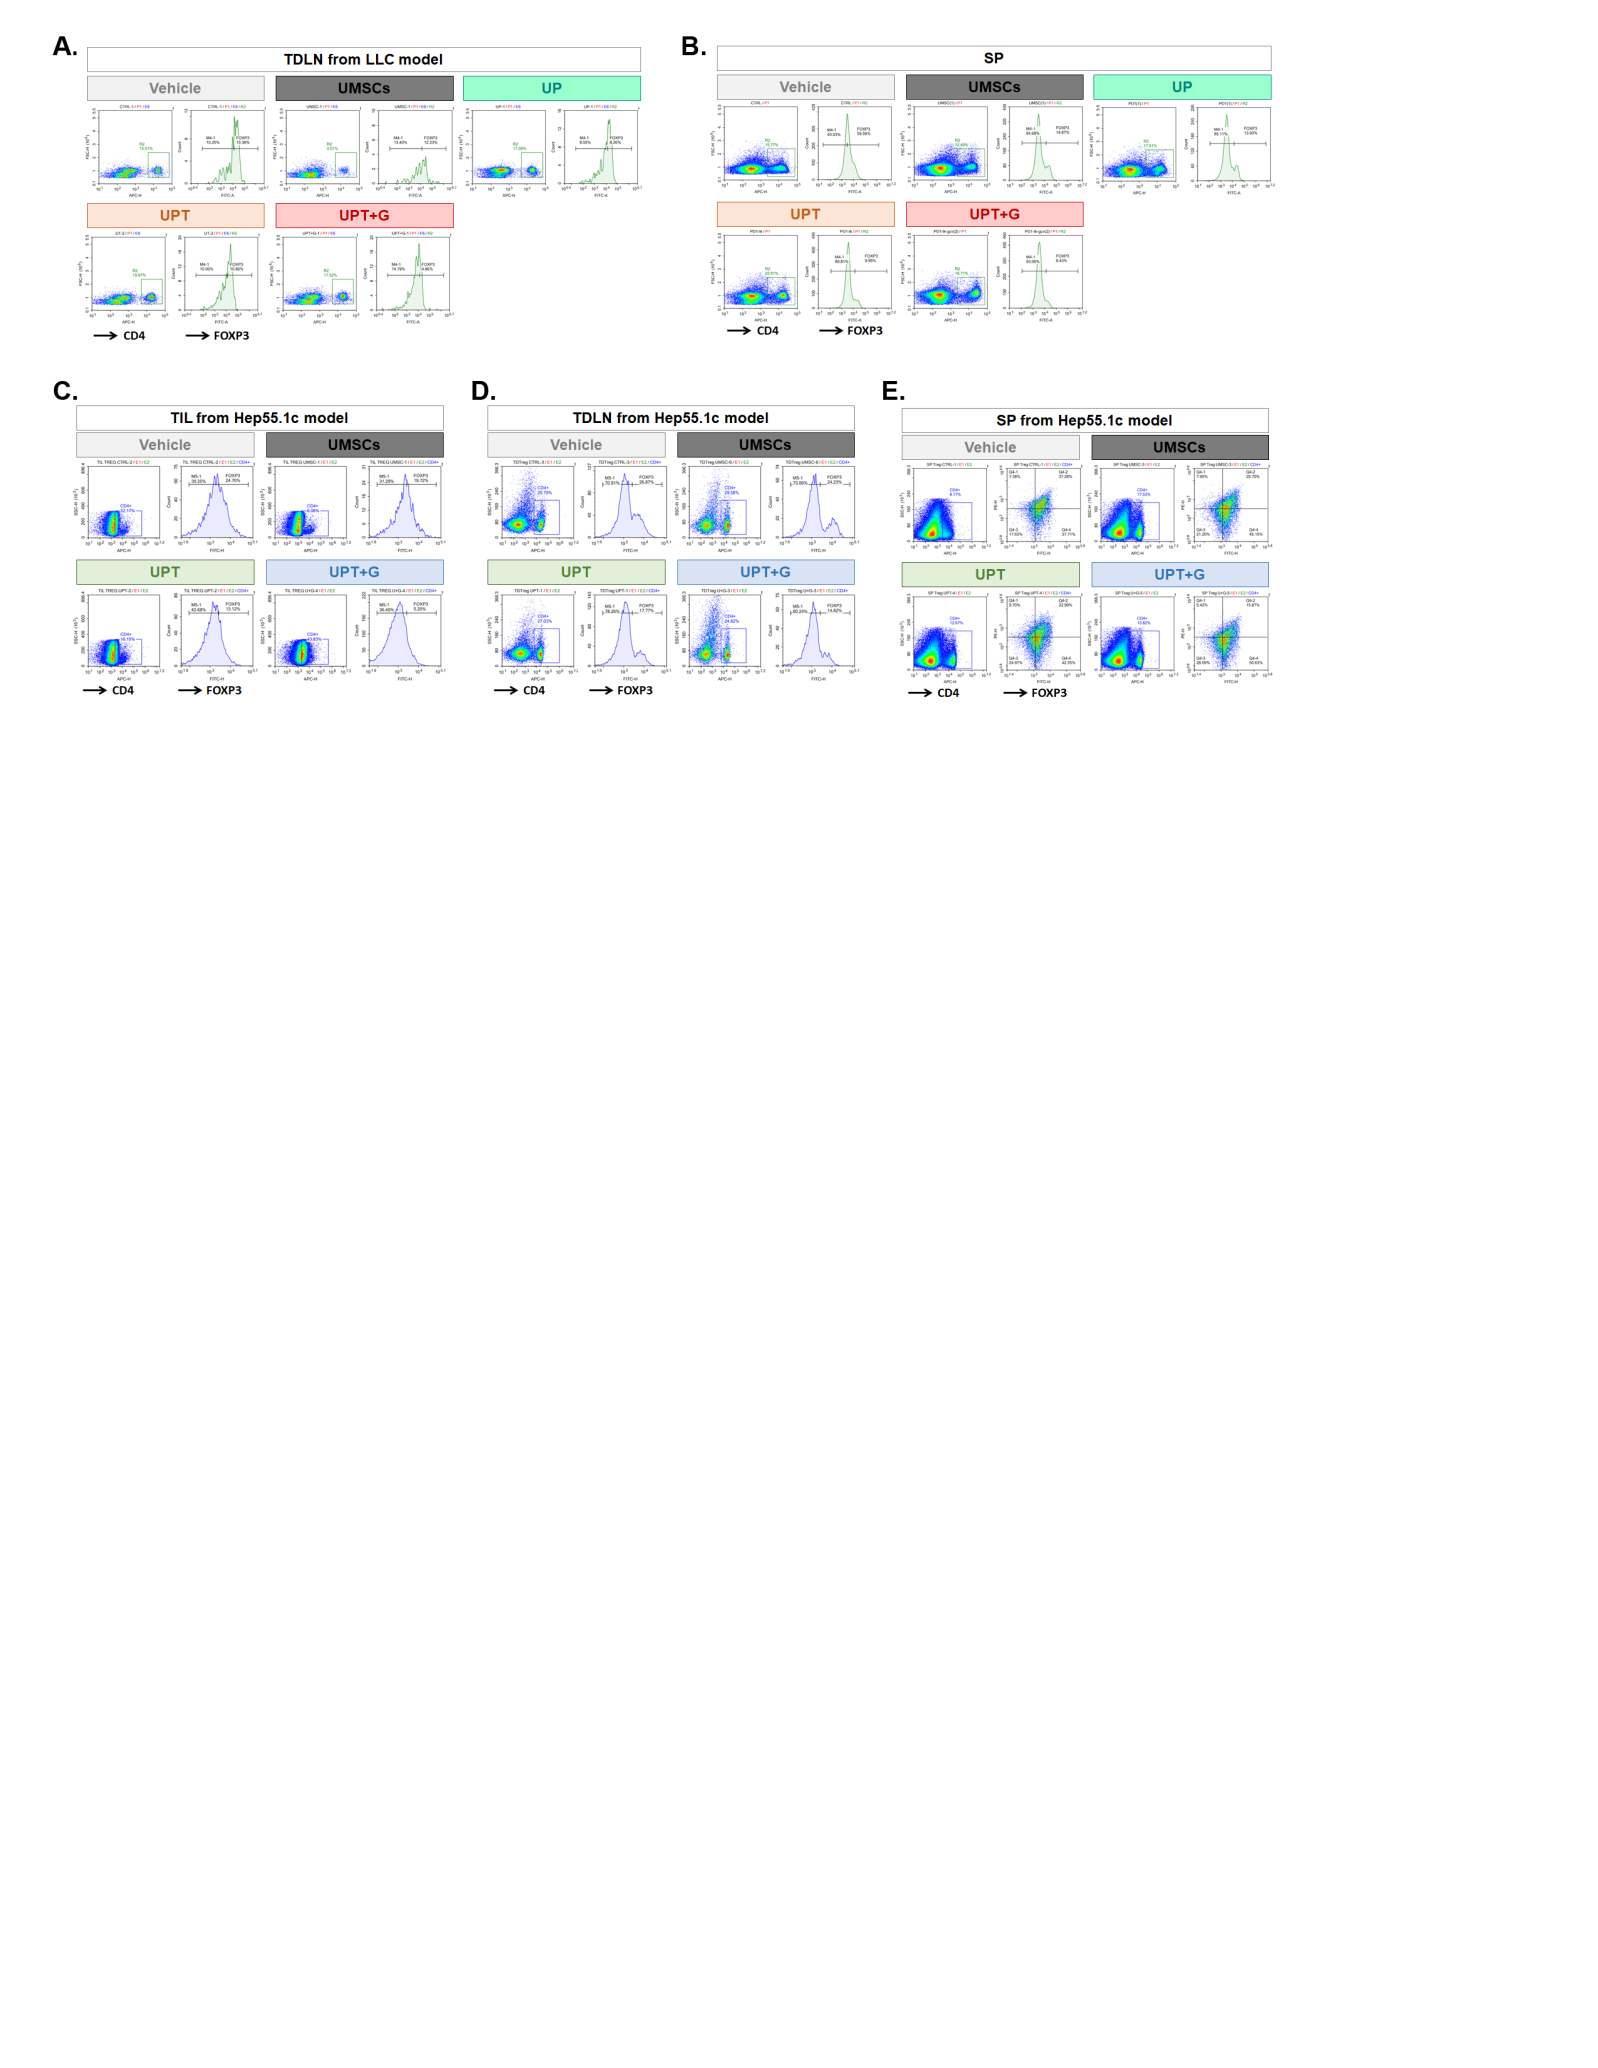


**Supplementary figure 8. *In vivo* immunoregulation of GE-MSCs on Tregs in LLC and Hep55.1c bearing model.** Expression pattern of CD4+FOXP3+ Tregs in (A, D) TDLN, (B, E) SP and (C) TIL in LLC or Hep55.1c were presented.


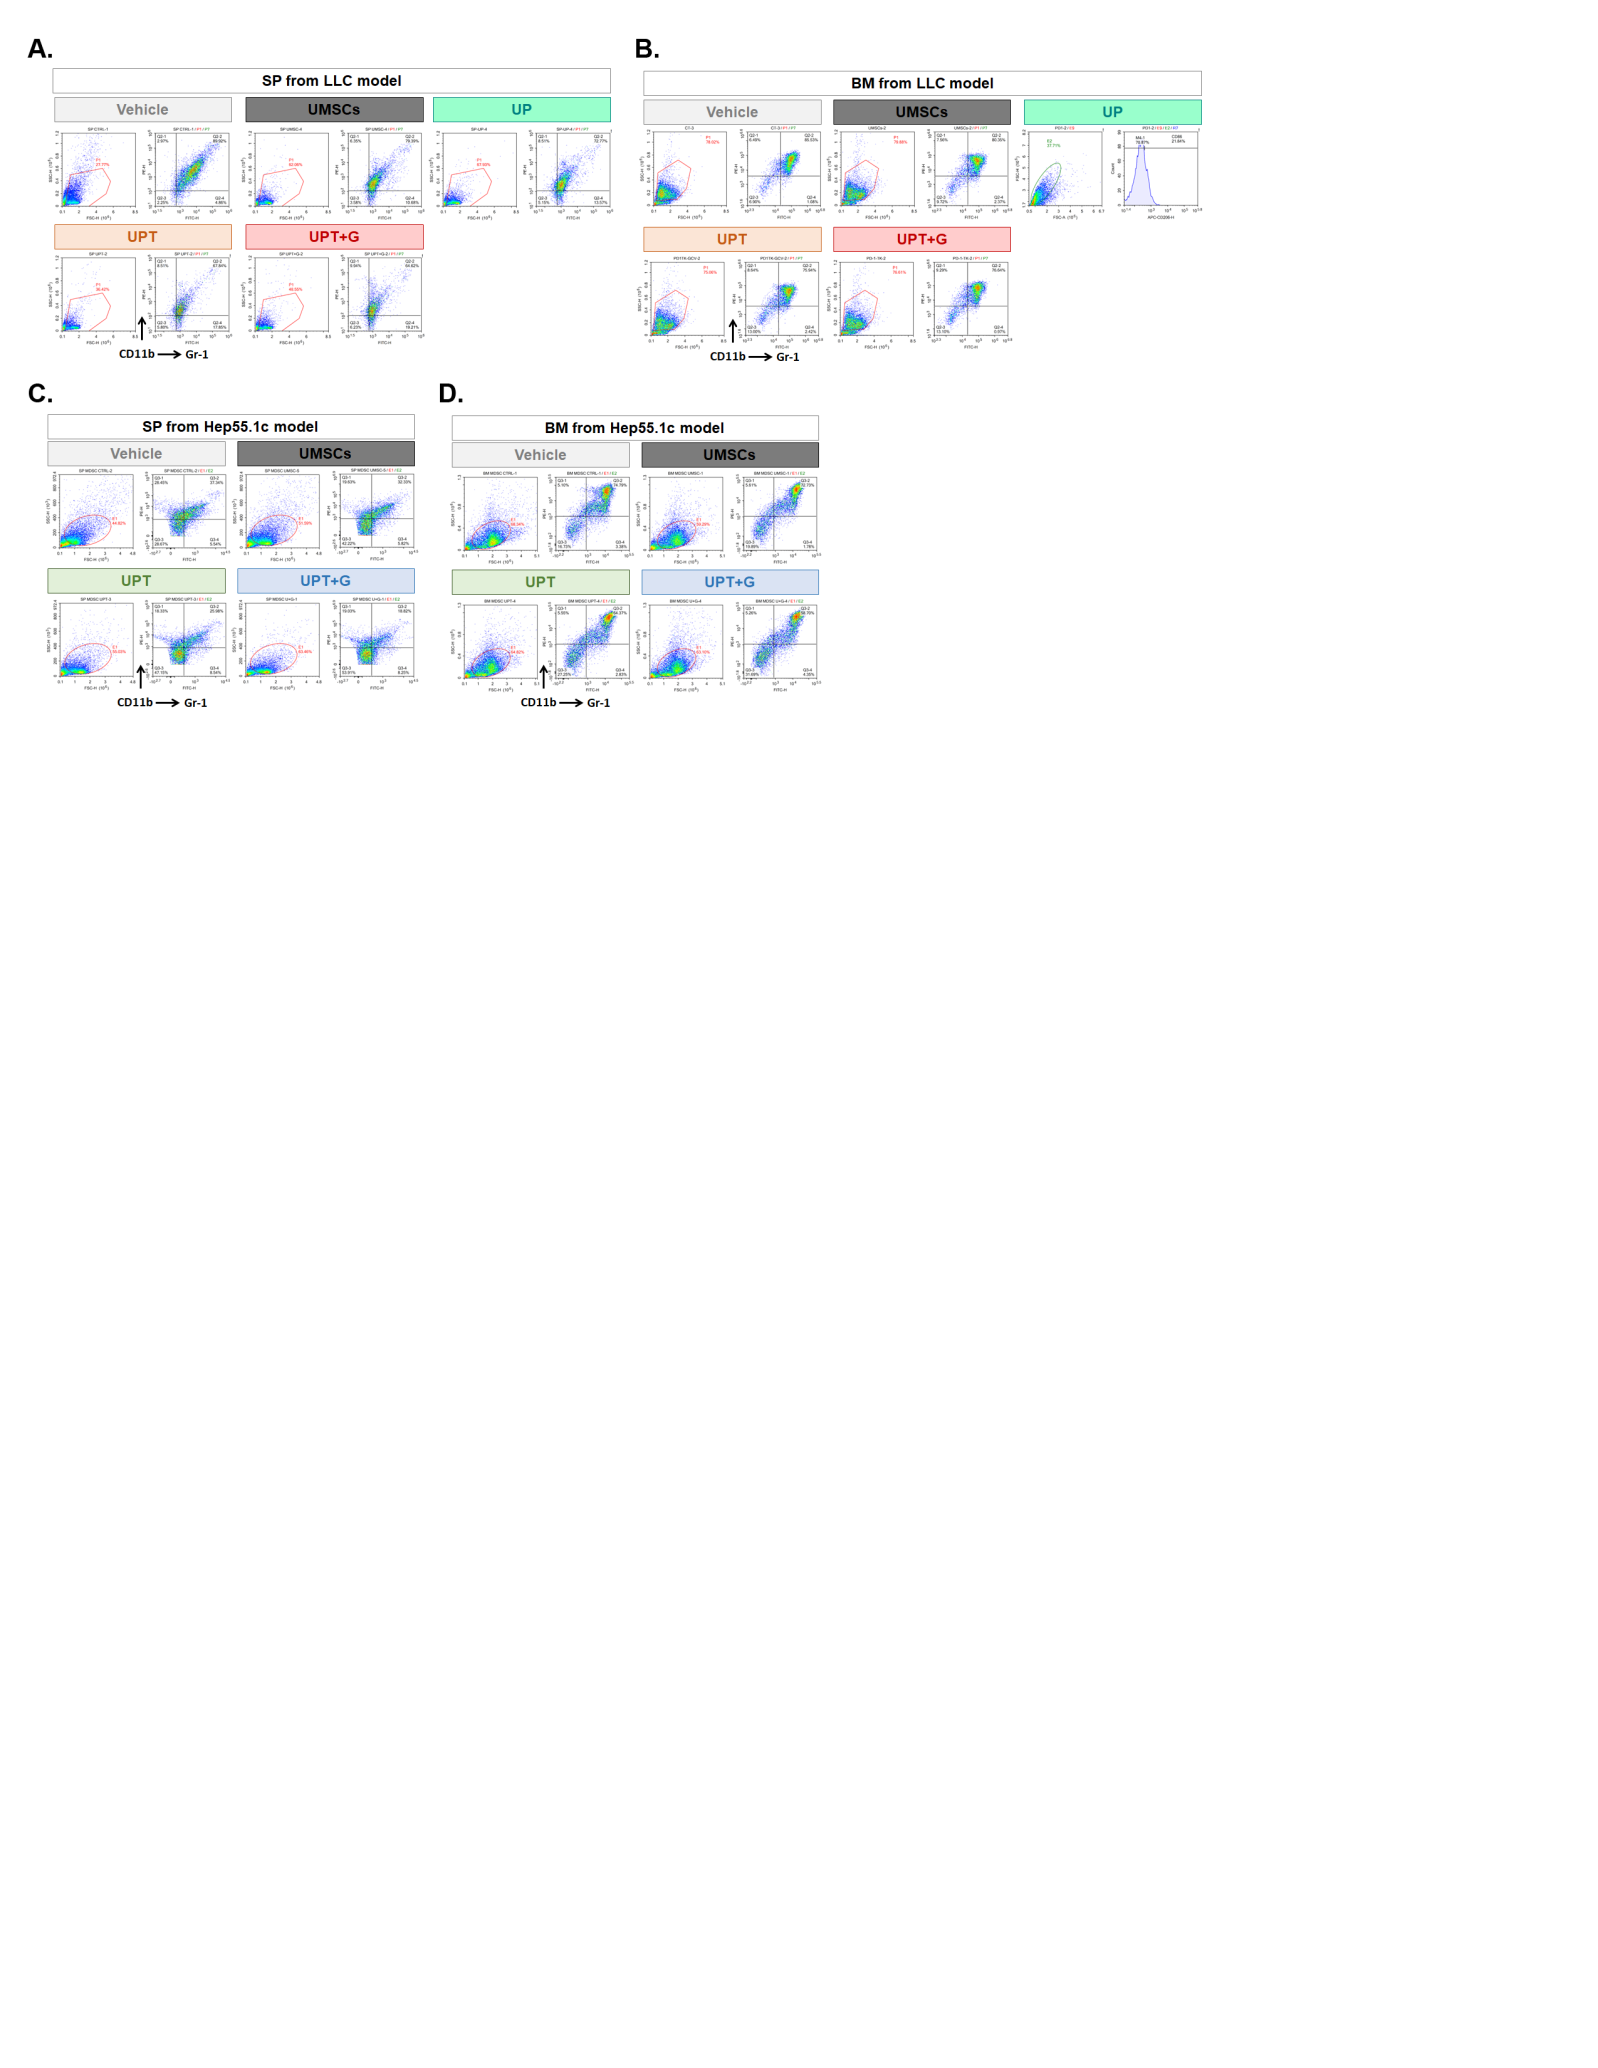


**Supplementary figure 9. *In vivo* immunoregulation of GE-MSCs on MDSCs in LLC and Hep55.1c bearing model.** Expression pattern of CD11b+Gr-1+ MDSCs in (A, C) SP, and (B, D) BM in LLC or Hep55.1c were presented.


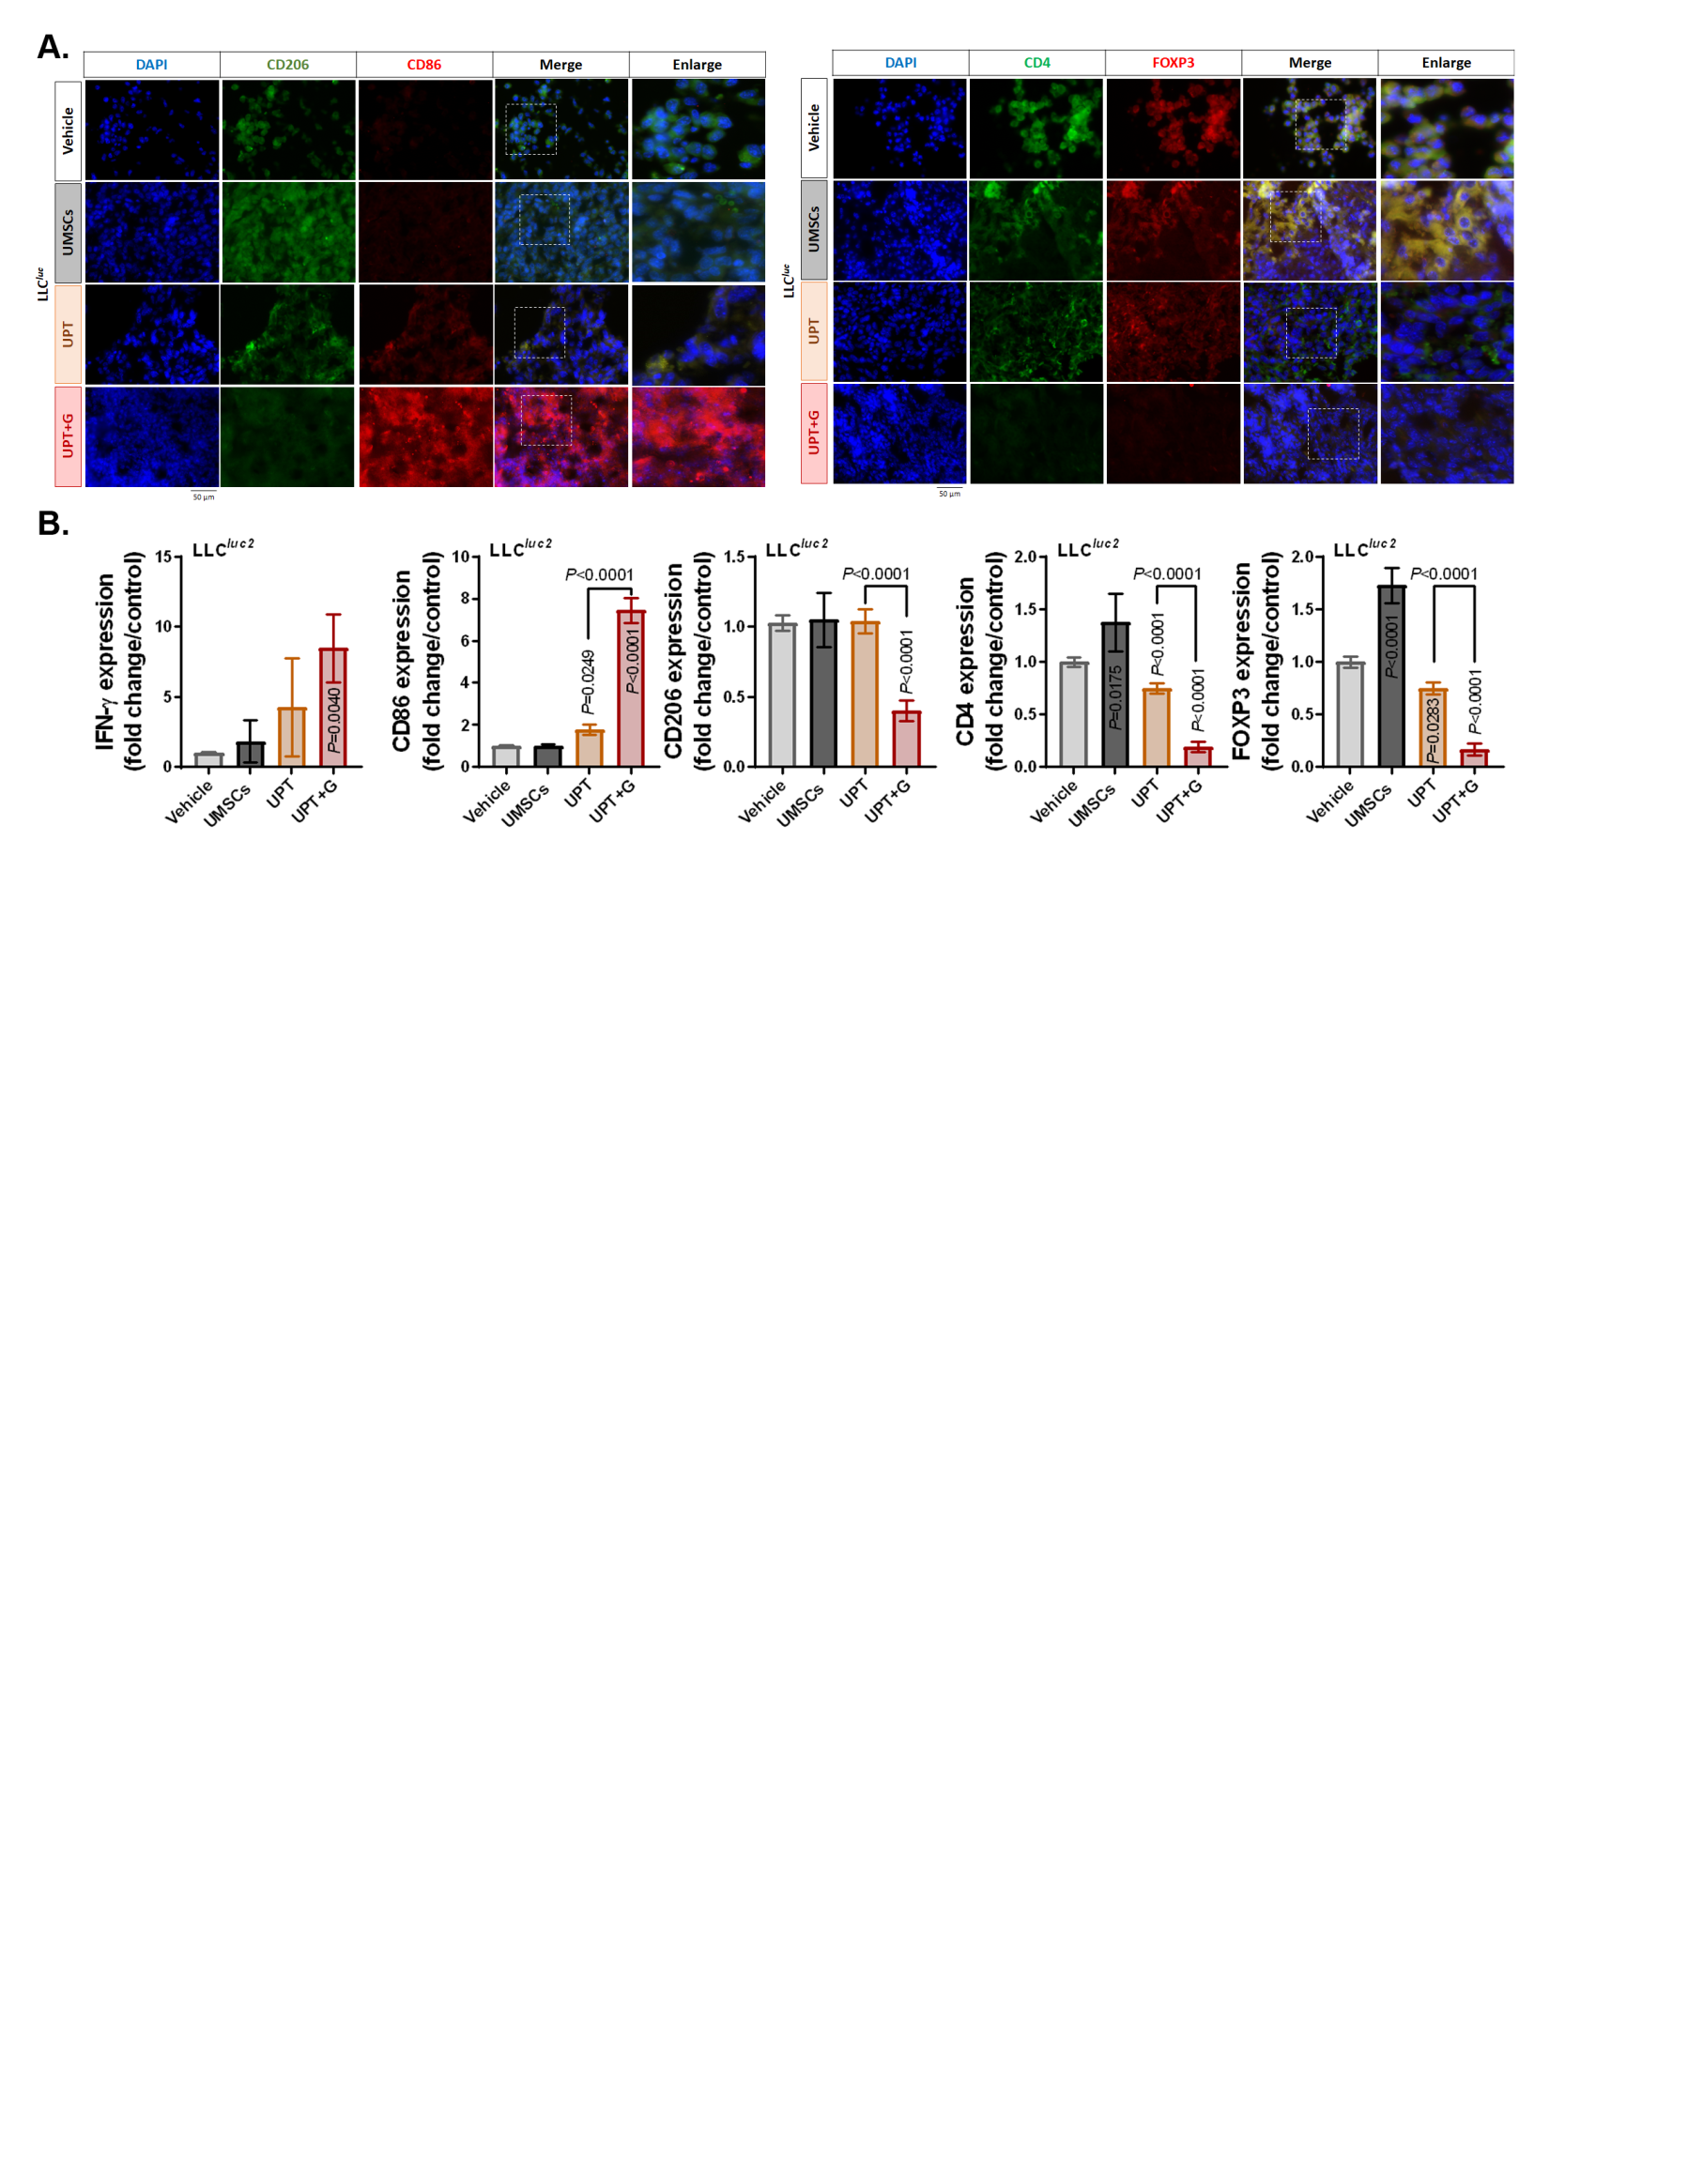


**Supplementary figure 10. *In vivo* immunoregulation of GE-MSCs on LLC tumor tissue by IF staining.** (A) Expression pattern of CD206 macrophage, CD86 macrophage, CD4 T cells, and FOXP3 Tregs and (B) their quantification bar chart were presented.


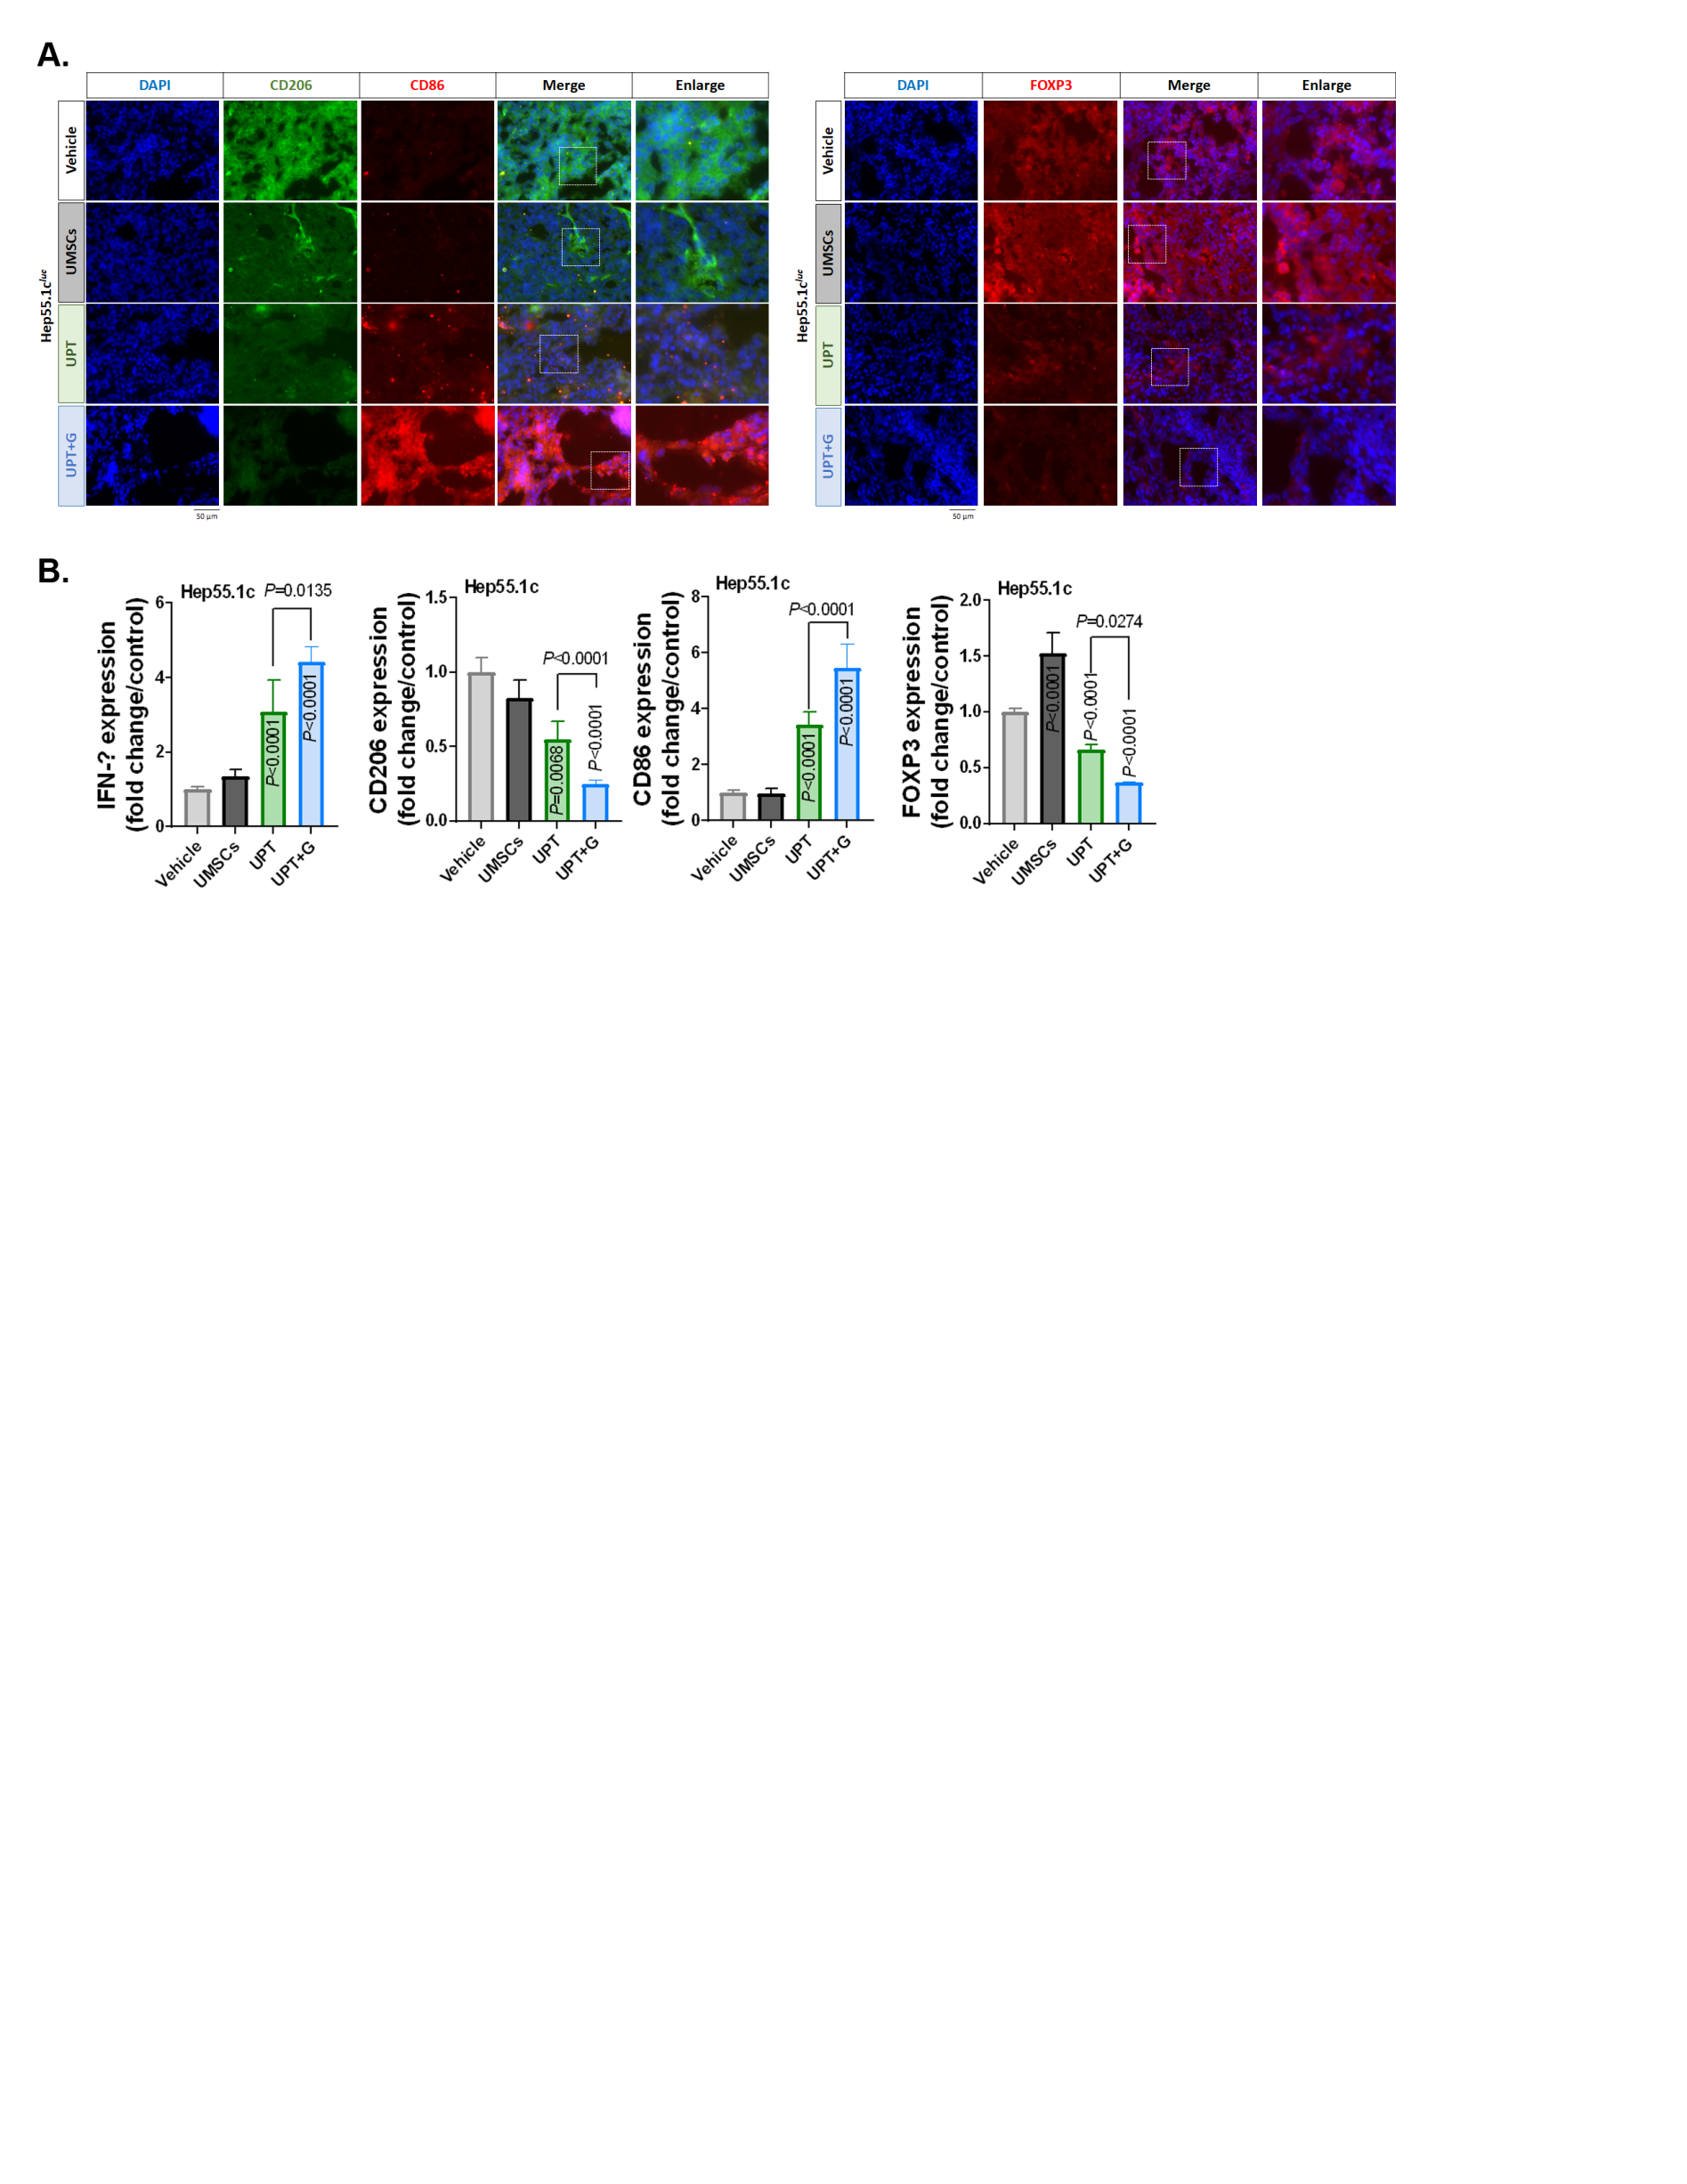


**Supplementary figure 11. *In vivo* immunoregulation of GE-MSCs on Hep55.1c tumor tissue by IF staining.** (A) Expression pattern of CD206 macrophage, CD86 macrophage, and FOXP3 Tregs and (B) their quantification bar chart were presented.


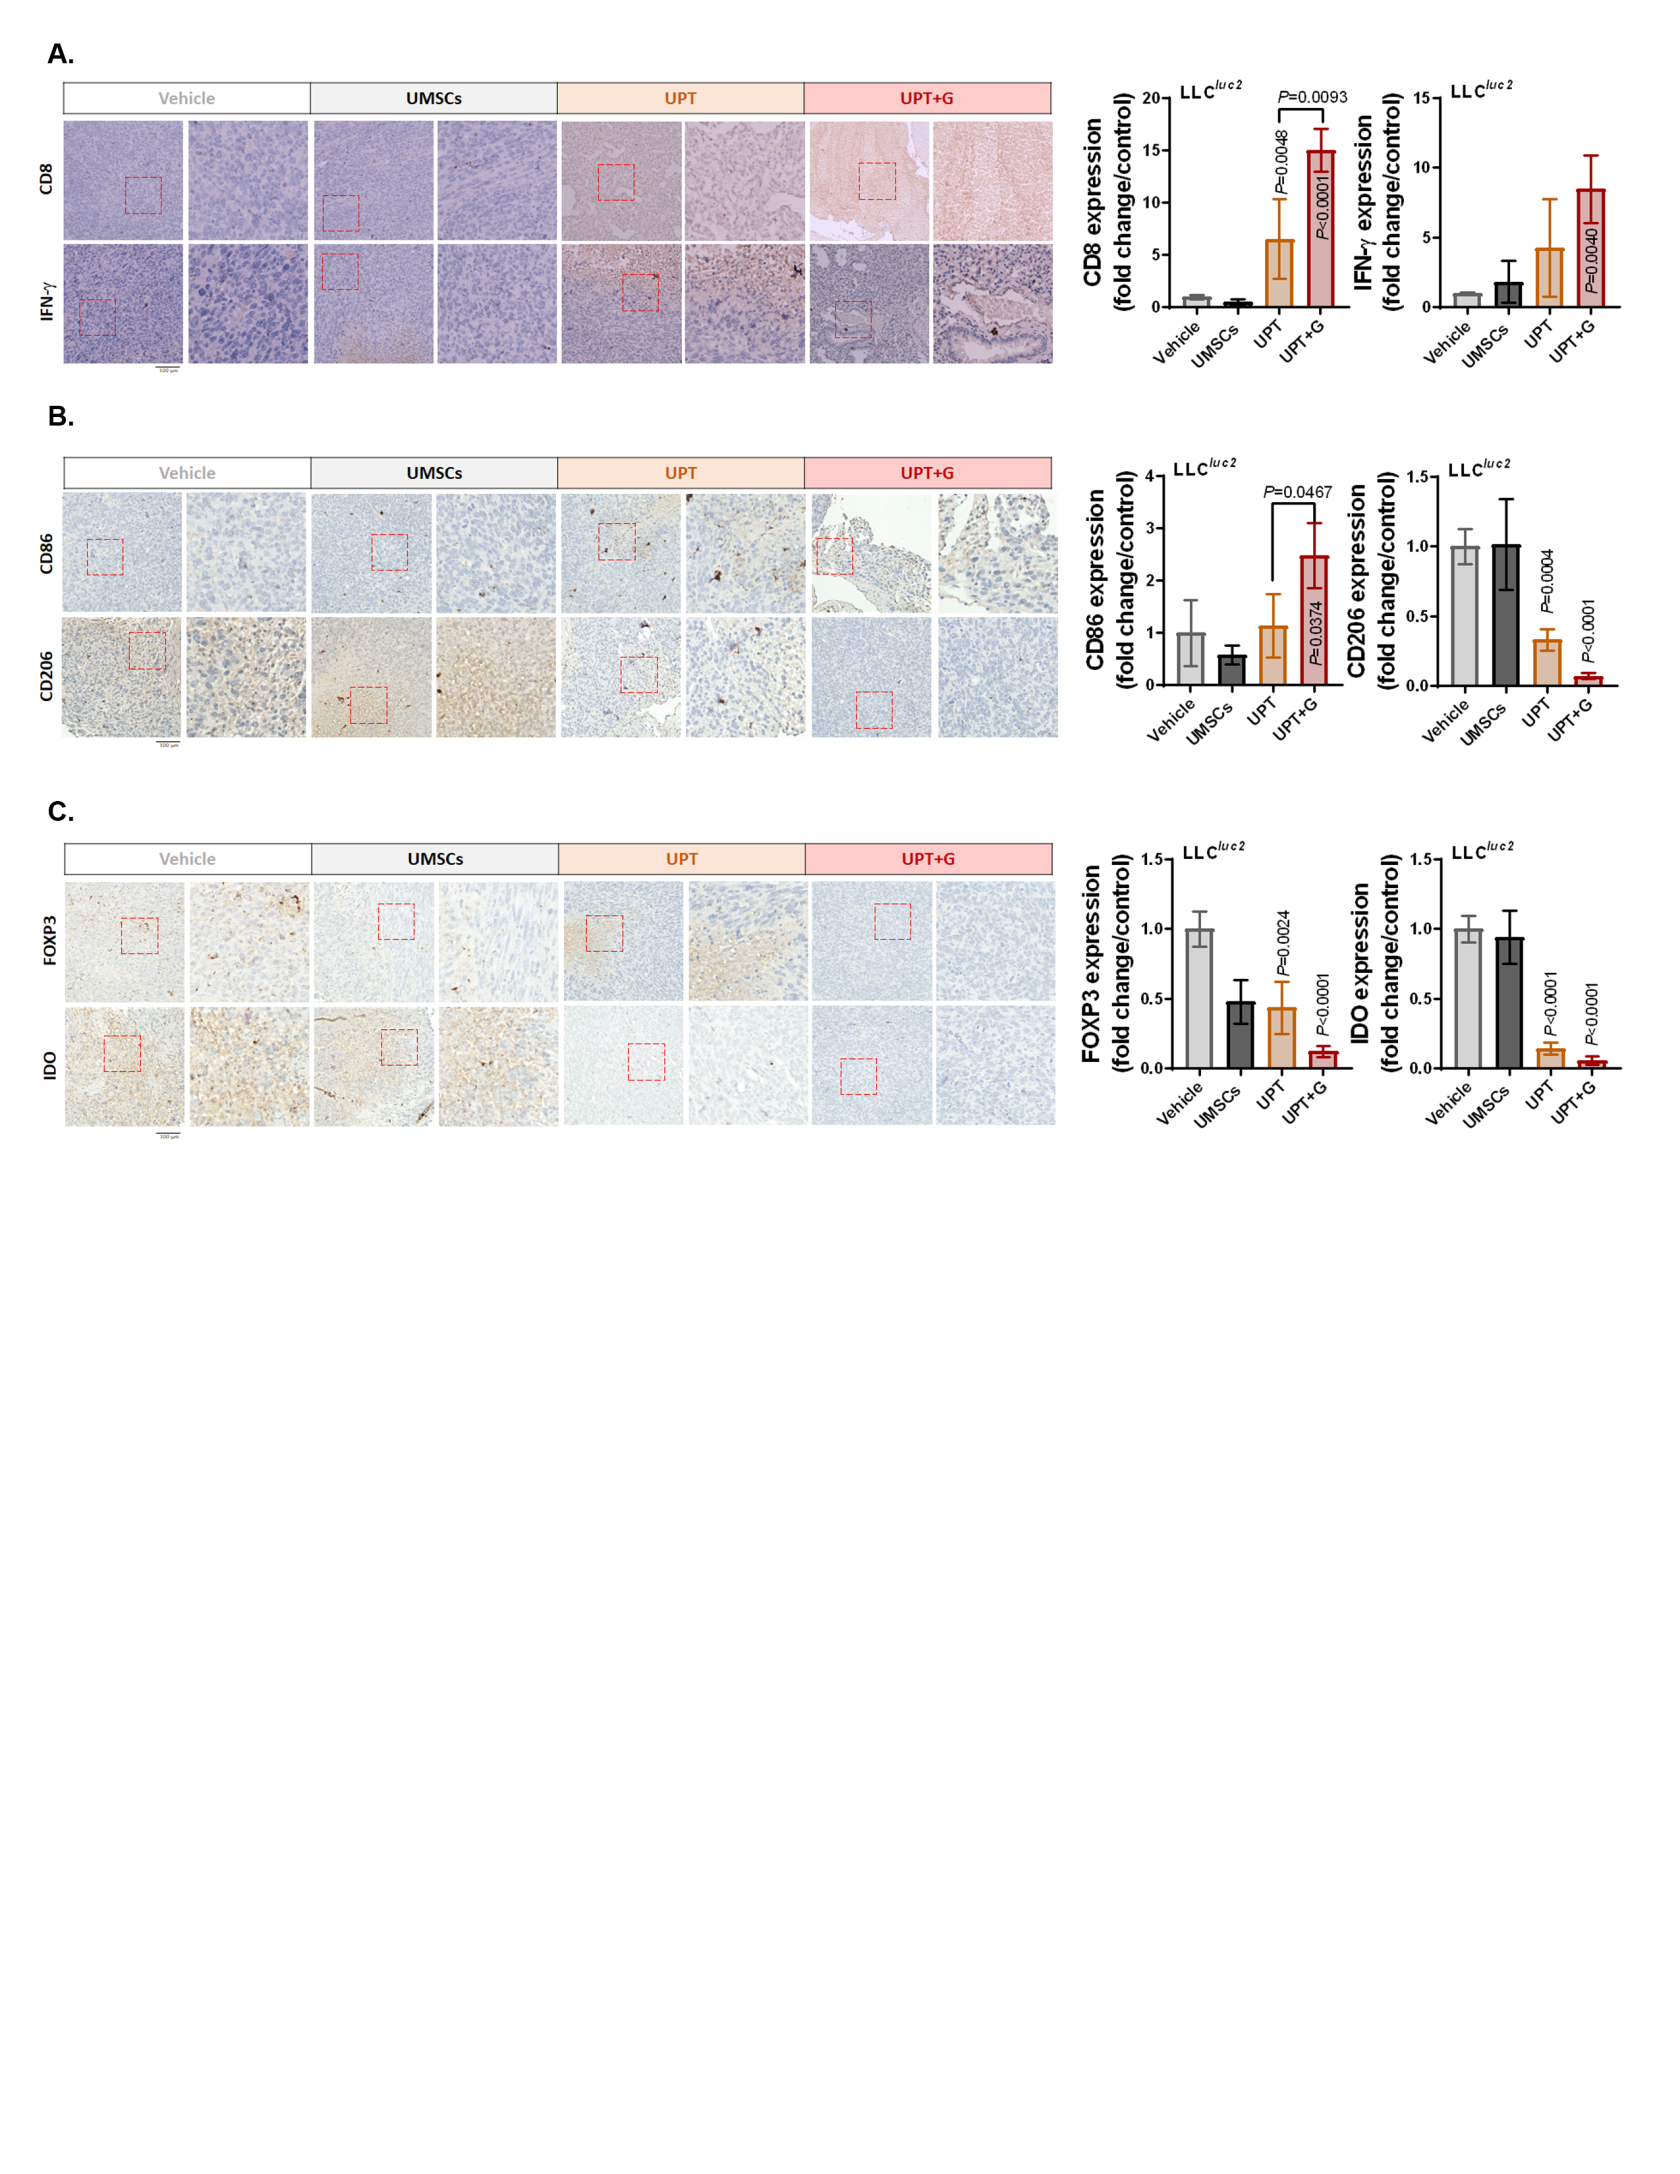


**Supplementary figure 12. *In vivo* immunoregulation of GE-MSCs on LLC tumor tissue by IHC staining.** Expression pattern and quantification bar chat of (A) CD8, IFN-, (B) CD86, CD206, and (C) FOXP3, IDO were presented on LLC bearing model.


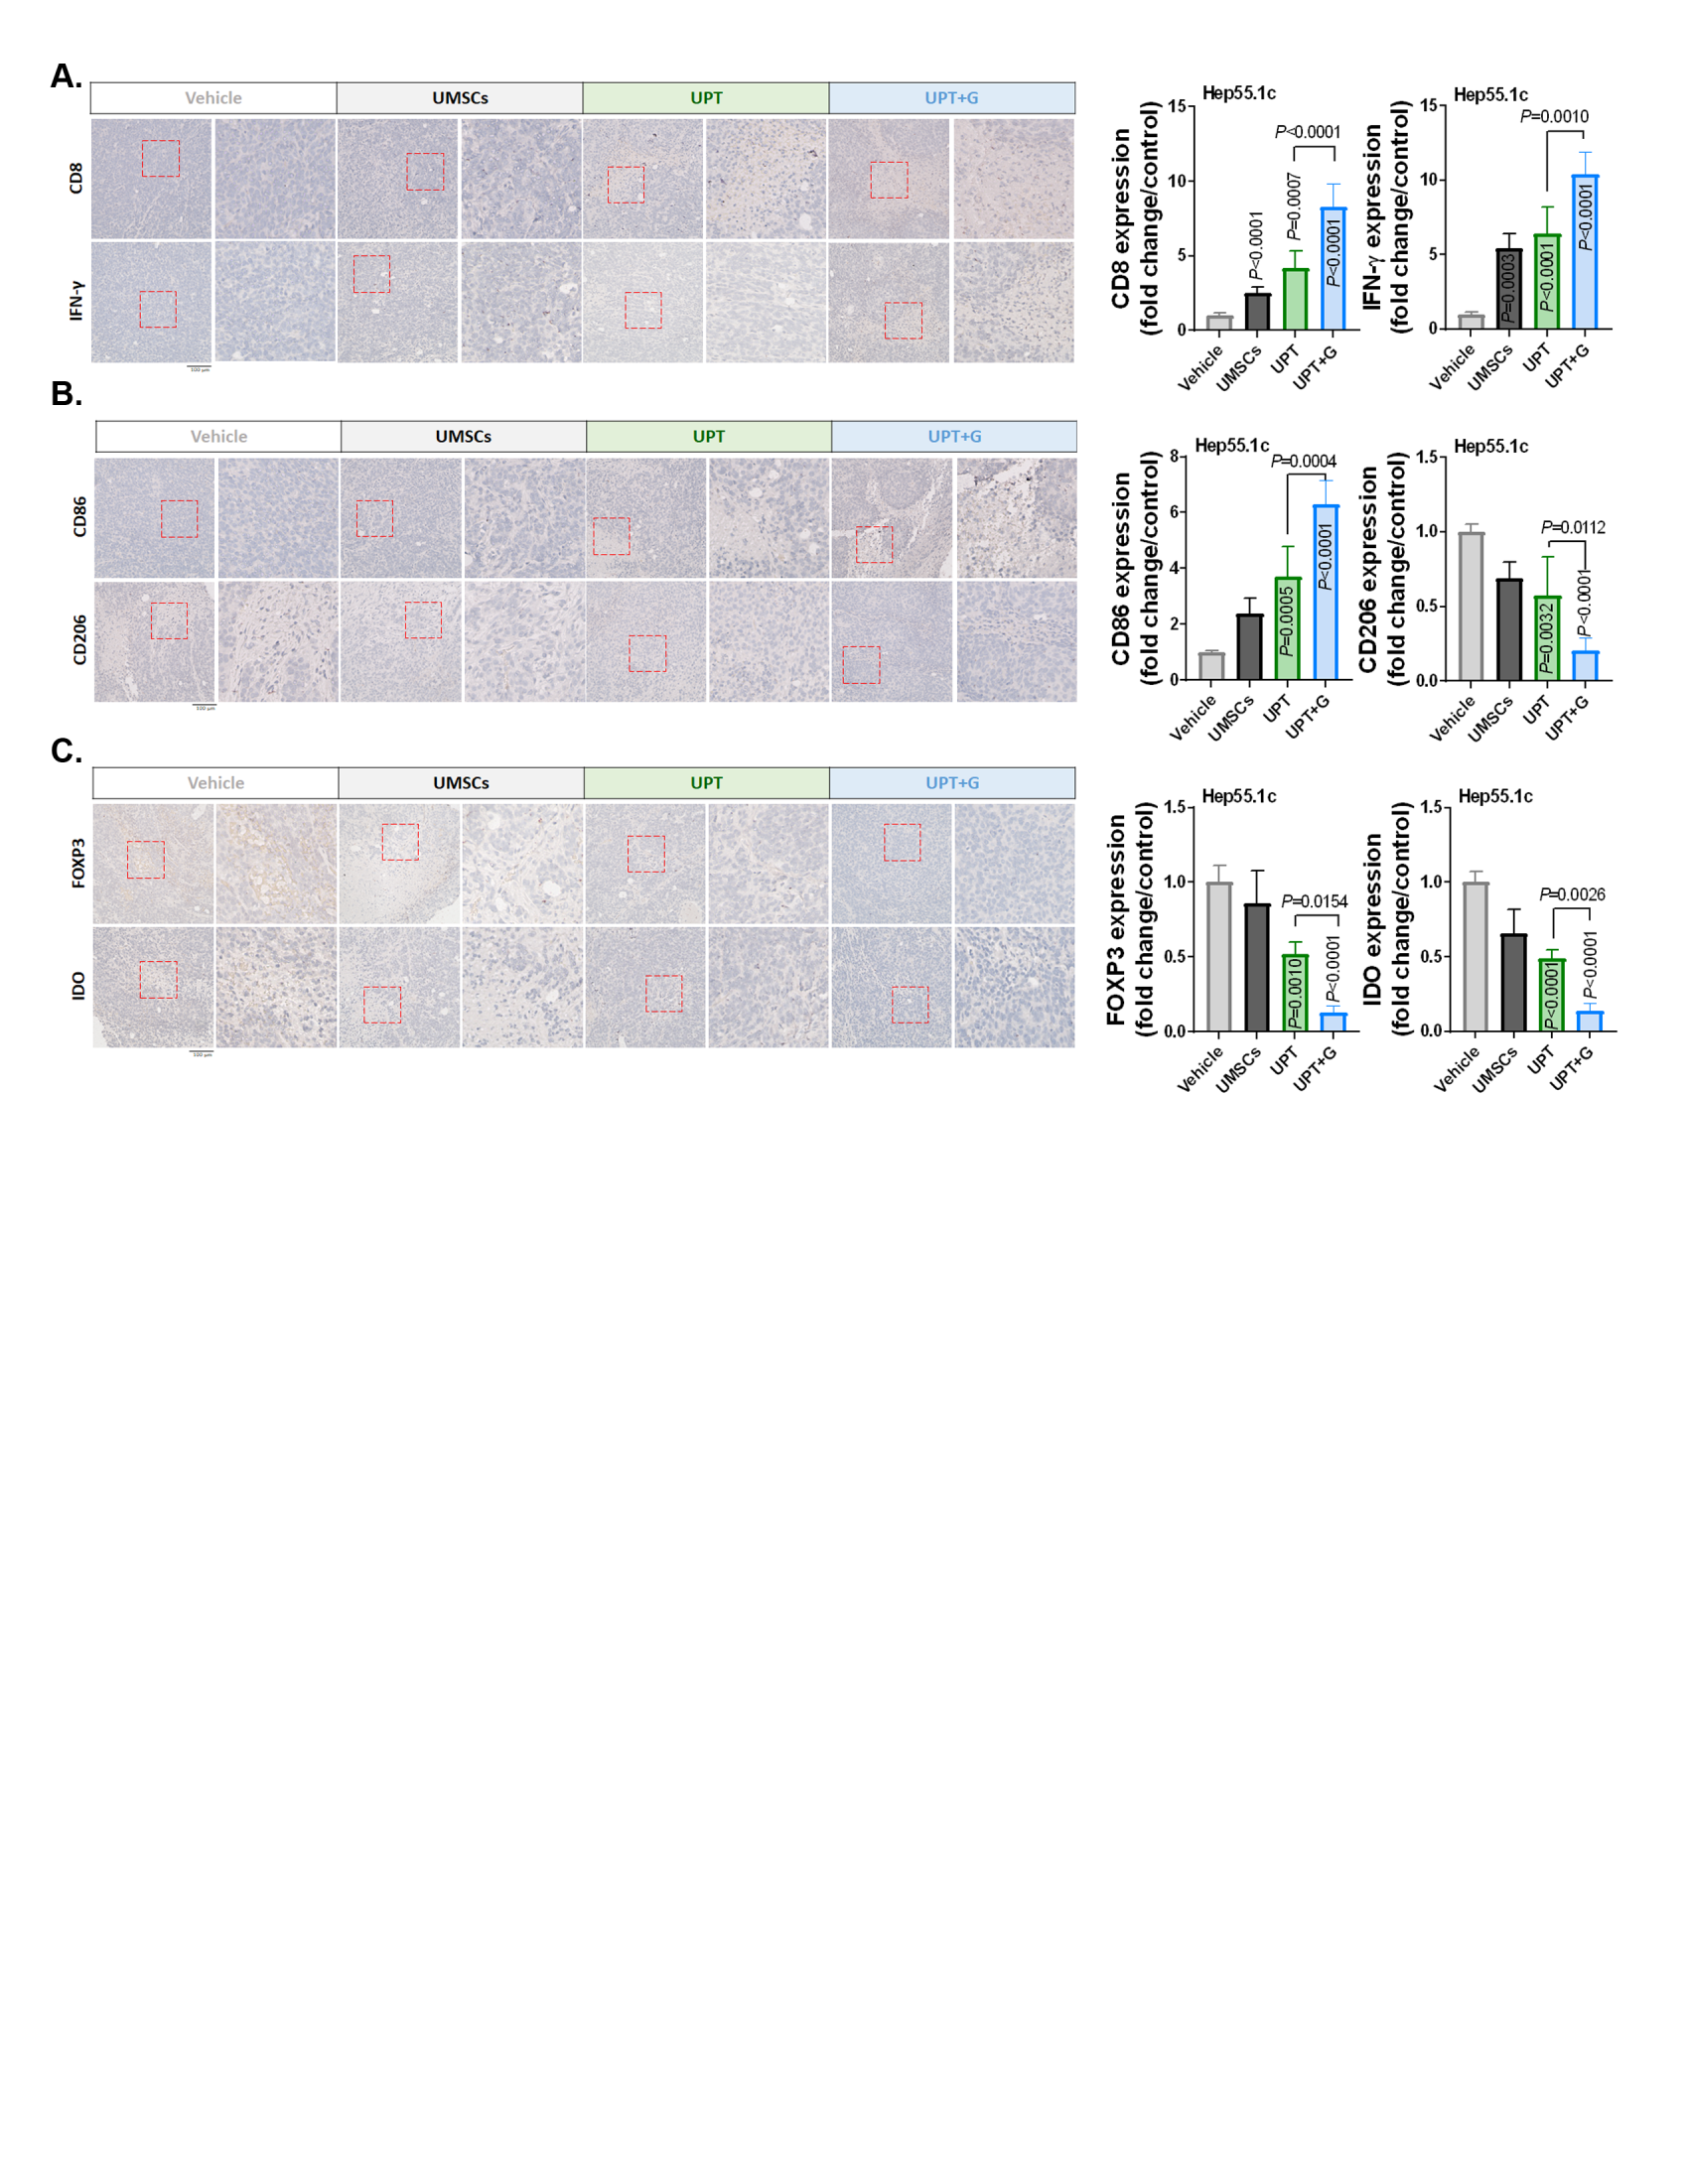


**Supplementary figure 13. *In vivo* immunoregulation of GE-MSCs on Hep55.1c tumor tissue by IHC staining.** Expression pattern and quantification bar chat of (A) CD8, IFN-, (B) CD86, CD206, and (C) FOXP3, IDO were presented on Hep55.1c bearing model.

**Supplementary Table 1**. **Reagents that used in this study.**

| Reagents | Company | Cat no. or product no. |
| --- | --- | --- |
| Amaxa™ Human MSC Nucleofactor™ kit | Lonza, Washington, DC, USA | VPE-1001 |
| Accutase™ Cell Detachment Solution | BD Bioscience, Franklin Lakes, NJ, USA | 561527 |
| BD IMag™ Anti- R-Phycoerythrin (PE) Magnetic Particles | BD Bioscience | 557899 |
| DMSO | Sigma-Aldrich, St.Louis, MO, USA | CAS 67-68-5 |
| D-Luciferin | GOLDBIO, St.Louis, MO, USA | 115144-35-9 |
| Fetal Bovine Sera | Hyclone Laboratories, Inc, Utah, UK | SH30396.02HI |
| Fixation Buffer | TONBO bioscience, San Diego, CA, USA | TNB-8222-L100 |
| Ganciclovir (GCV) | Sigma-Aldrich | G2536 |
| Genomic DNA Mini Kit | Geneaid, New Taipei City, Taiwan | GB100 |
| HBSS (1X) | HyClone, Logan, UT, USA | SH30588.01 |
| ImmunoCult™ Human CD3/CD28 T Cell Activatior | STEMCELL™, Vancouver, BC, Canada | 10971 |
| iTaq Universal SYBR green Supermix | Bio-Rad, Hercules, CA, USA | 1725121 |
| LumiFlash™ Infinity Chemiluminescent Substrate, HRP System | Visual protein, Taipei, Taiwan | LF16-500 |
| MSC NutriStem® XF Basal Medium, without Phenol Red | Biological Industries, Israel | 05-202-1A |
| MSC NutriStem® XF Supplement Mix | Biological Industries | 05-201-1U |
| NutriFreez® D10 Cryopreservation Medium | Sartorius, Göttingen, Germany | 05-713-1A |
| P1 Primary Cell 4D-Nucleofector™ X Kit L | Lonza | V4XP-1012 |
| Pierce™ BCA Protein Assay Kits | Thermo Fisher, Waltham, MA, USA | 23225 |
| PureLink™ RNA Mini Kit | Invitrogen, Waltham, MA, USA | 12183018A |
| Puromycin (10 mg/ml) | InvivoGen, San Diego, CA, USA | ant-pr |
| Recombinant Human M-CSF/ CSF-1 Protein | Sino Biological, Beijing, China | 11792-HNAH |
| Recombinant Mouse GM-CSF/ CFS2 Protein | Sino Biological | 10015-HNAH |
| Recombinant Mouse Interleukin-13 Protein | Sino Biological | 50225-MNAH |
| Recombinant Mouse Interleukin-4 Protein | Sino Biological | 51084-MNAE |
| Recombinant Mouse Interferon Gamma Protein | Sino Biological | 50709-MNAH |
| Recombinant Human Interleukin-13 Protein | Sino Biological | 10369-HNAC |
| Recombinant Human Interleukin-4 Protein | Sino Biological | 11846-HNAE |
| Recombinant Human Interferon gamma protein | Sino Biological | 11725-HNAE |
| StemPro™ Osteogenesis Differentiation Kit | Thermo Fisher | A1007201 |
| StemPro™ Chondrogenesis Differentiation Kit | Thermo Fisher | A1007101 |
| TrypLE™ Select (1X) | Thermo Fisher | 12563029 |
| Total Exosome Isolation Reagent (from cell culture media) | Thermo Fisher | 4478359 |
| Tumor Dissociation Kit, mouse | Miltenyi Biotec , Germany | 130-096-730 |
| UltraGRO™-Advanced | AventaCell, Atlanta, GA, USA | HPCFDCRL10 |
| XenoLight DiR cell tracing dye | PerkinElmer, Waltham, MA, USA | 125964 |

**Supplementary Table 2**. **Antibodies and reagents were used for flow cytometry in this study.**

| Antibodies | Company | Product no. |
| --- | --- | --- |
| PE Rat Anti-Mouse CD45 | BD Bioscience | 553081 |
| Alexa Fluor647 Rat Anti-Mouse CD206 | BD Bioscience | 565250 |
| Alexa 488 anti-mouse | Abcam, Cambridge, UK | ab150113 |
| Alexa 555 anti-rabbit | Abcam | ab150078 |
| Alexa Fluor488 Mouse anti-human FOXP3 | BD Bioscience | 561181 |
| APC Hamster Anti-Mouse CD11c | BD Bioscience | 550261 |
| APC Mouse anti-human CD4 | BD Bioscience | 5566915 |
| APC Mouse anti-human CD8 | BD Bioscience | 5566852 |
| APC Mouse anti-human CD11c | BD Bioscience | 559877 |
| APC Mouse anti-human CD86 | BD Biosicence | 555660 |
| APC anti-human CD279 (PD-1) | BD Bioscience | 558694 |
| BB700 Rat Anti-Mouse CD83 | BD Bioscience | 742263 |
| BD Horizon™ Violet Proliferation Dye 450 | BD Bioscience | 562158 |
| BD Pharmingen™ FITC Annexin V Apoptosis Detection Kit I | BD Bioscience | 556547 |
| CellTrace™ CFSE Cell Proliferation Kit | Thermo Fisher Scientific | C34554 |
| DAPI | BD Bioscience | 564907 |
| FITC Mouse anti-human CD11b | BD Bioscience | 562793 |
| FITC Rat Anti-Mouse CD11b | BD Bioscience | 553310 |
| FITC Mouse anti-human CD8 | BD Biosicence | 555366 |
| FITC Mouse anti-human CD56 | BD Bioscience | 562794 |
| FITC Mouse anti-human CD62L | BD Bioscience | 555543 |
| Mouse dendritic cell enrichment set | BD Bioscience | 557955 |
| PE Mouse anti-human CD3 | BD Biosicence | 555333 |
| PE Mouse anti-human CD25 | BD Bioscience | 555432 |
| PE Mouse anti-human CD44 | BD Bioscience | 555479 |
| PE Mouse anti-human CD206 | BD Bioscience | 555954 |
| PE Mouse anti-human Granzyme B | BD Bioscience | 561142 |
| PE Rat Anti-Mouse I-A/I-E (MHC-II) | BD Bioscience | 557000 |

**Supplementary Table 3. Antibodies that used for Western blotting, IHC and IF staining in this study.**

| Antibodies | Company | Ratio | Product no. |
| --- | --- | --- | --- |
| Alexa 488 anti-mouse | Abcam, Cambridge, UK | 1:200 | ab150113 |
| Alexa 555 anti-rabbit | Abcam | 1:200 | ab150078 |
| CD4 | Invitrogen | 1:500 | 14-0042-85 |
| CD8 | Abcam | 1:500 | ab217344 |
| CD86 (E2G8P) Rabbit | Cell signaling Technology | 1:200 | #91882 |
| CD206/MRC1 (E6T5J) | Cell signaling Technology | 1:200 | #24595 |
| Cleaved-Caspase-3 (ASP) | Cell signaling Technology | 1:400 | #9661 |
| DAPI | BD Bioscience | 1:10000 | 564907 |
| FOXP3 | Elabscience, Houston, TX, USA | 1:200 | E-AB-30191 |
| HSV1-TK (HHV-TK) | Thermo Fisher Scientific | 1:200 | PA5-67984 |
| IFN- | Thermo Fisher Scientific | 1:200 | #MM701 |
| Ki67 | Abcam | 1:500 | ab15580 |
| PD-1 (PDCD1) | Origene | 1:200 | UM800091 |
| PD-L1 | Thermo Fisher Scientific | 1:200 | PA5-20343 |

**Supplementary Table 4**. **Protocol for qPCR.**

| Component | Volume /10 μl Reaction, μl | Final concentration |
| --- | --- | --- |
| SYBR Green (2x) | 5 | 1x |
| Forward and Revers primer | 0.4 | 400 nM each primer |
| DNA | 2 | Genomic DNA 100 ng |
| H2O | 2.2 |  |

**Supplementary Table 5**. **Primer of qPCR.**

| Gene |  | Primer sequence |
| --- | --- | --- |
| hPD1 | F | 5′- TTTGAGGGGGAGCCGATTAG -3′ |
|  | R | 5′- CCACTCCCATTCTGTCGGAG -3′ |
| HSV TK | F | 5’-CTGGTTATTGTGCTGTCTC-3’ |
|  | R | 5’- CCATTGTTATCTGGGCGC-3’ |

**Supplementary Table 6. Individual SPECT Signal (%ID/g) in G1, G2, G3, and G4 groups on Day 7. Muscle %ID/g on day 0 (4hr) is 0.279.**

| Group | Animal  ID | Brain  (%ID/g) | Liver  (%ID/g) | Lung  (%ID/g) | Spleen  (%ID/g) | Heart  (%ID/g) | Kidneys  (%ID/g) | Testes (%ID/g) |
| --- | --- | --- | --- | --- | --- | --- | --- | --- |
| 1 | 30 | 0.005 | 0.028 | 0.017 | 0.012 | 0.011 | 0.020 | 0.013 |
| 1 | 35 | 0.004 | 0.023 | 0.009 | 0.004 | 0.009 | 0.023 | 0.007 |
| 1 | 89 | 0.001 | 0.011 | 0.009 | 0.003 | 0.003 | 0.022 | 0.005 |
| 1 | 90 | 0.001 | 0.009 | 0.007 | 0.003 | 0.003 | 0.008 | 0.004 |
| 2 | 33 | 0.008 | 0.033 | 0.031 | 0.004 | 0.013 | 0.024 | 0.013 |
| 2 | 34 | 0.004 | 0.021 | 0.023 | 0.007 | 0.012 | 0.038 | 0.013 |
| 2 | 28 | 0.001 | 0.009 | 0.001 | 0.002 | 0.002 | 0.010 | 0.003 |
| 2 | 87 | 0.001 | 0.010 | 0.002 | 0.003 | 0.003 | 0.019 | 0.007 |
| 2 | 97 | 0.002 | 0.015 | 0.005 | 0.003 | 0.006 | 0.017 | 0.007 |
| 3 | 31 | 0.007 | 0.014 | 0.028 | 0.011 | 0.015 | 0.054 | 0.057 |
| 3 | 32 | 0.002 | 0.020 | 0.009 | 0.004 | 0.005 | 0.044 | 0.010 |
| 3 | 85 | 0.001 | 0.007 | 0.010 | 0.003 | 0.002 | 0.007 | 0.006 |
| 3 | 92 | 0.003 | 0.002 | 0.007 | 0.007 | 0.001 | 0.010 | 0.004 |
| 3 | 94 | 0.003 | 0.014 | 0.015 | 0.006 | 0.007 | 0.039 | 0.019 |
| 4 | 27 | 0.005 | 0.028 | 0.017 | 0.012 | 0.011 | 0.020 | 0.013 |
| 4 | 29 | 0.004 | 0.023 | 0.009 | 0.004 | 0.009 | 0.023 | 0.007 |
| 4 | 84 | 0.001 | 0.011 | 0.009 | 0.003 | 0.003 | 0.022 | 0.005 |
| 4 | 91 | 0.001 | 0.009 | 0.007 | 0.003 | 0.003 | 0.008 | 0.004 |
| 4 | 93 | 0.008 | 0.033 | 0.031 | 0.004 | 0.013 | 0.024 | 0.013 |

**Supplementary Table 7.** Statistical analysis of LLC*luc* tumor volume in different UMSCs treatment groups and dates.

| **LLC*luc*** | | | | |
| --- | --- | --- | --- | --- |
| **Tukey's multiple comparisons test** | **95% CI of diff.** | **Significant** | **Summary** | **Adjusted *p*-Value** |
| **Day -2** | | | | |
| Veh vs. UMSCs | -32.42 to 22.43 | No | ns | 0.9593 |
| Veh vs. UPT | -34.11 to 12.85 | No | ns | 0.6114 |
| Veh vs.UPT+G | -28.00 to 18.96 | No | ns | 0.9525 |
| UPT vs. UPT+G | -18.42 to 30.63 | No | ns | 0.9044 |
| **Day 4** | | | | |
| Veh vs. UMSCs | -20.52 to 42.81 | No | ns | 0.7735 |
| Veh vs. UPT | -26.03 to 37.30 | No | ns | 0.9618 |
| Veh vs.UPT+G | -16.27 to 47.06 | No | ns | 0.5551 |
| UPT vs. UPT+G | -21.90 to 41.42 | No | ns | 0.8035 |
| **Day 11** | | | | |
| Veh vs. UMSCs | 0.1965 to 71.00 | Yes | * | 0.0484 |
| Veh vs. UPT | 21.12 to 91.92 | Yes | *** | 0.0008 |
| Veh vs.UPT+G | 63.61 to 126.9 | Yes | **** | <0.0001 |
| UPT vs. UPT+G | 3.349 to 74.15 | Yes | * | 0.0278 |

**Supplementary Table 8.** Effects of UMSCs treatment on average tumor growth duration, delay time, inhibition rate, and enhancement ratio in LLC*luc*-bearing mice.

| **Treatment** | **MTGT (day)*** | **MTGDT (day)%** | **MGIR$** |
| --- | --- | --- | --- |
| **Vehicle** | 7.22 | NA | NA |
| **UMSCs** | 9.33 | 2.10 | 1.29 |
| **UPT** | 11.53 | 4.33 | 1.60 |
| **UPT+GCV** | 16.22 | 9.00 | 2.25 |

*Mean Tumor Growth Time (MTGT): The time at which the LLC*luc* tumor volume reached 100 mm3 is considered as the MTGT.

%Mean Tumor Growth Delay Time (MTGDT): MTGDT is calculated as the mean LLC*luc* tumor growth time of the treated group minus that of the vehicle group.

$Mean Growth Inhibition Rate (MGIR): MGIR is determined by dividing the mean LLC*luc* tumor growth time of the treated group by the mean tumor growth time of the untreated group.

NA: "Not available" indicates that certain information or data is currently unavailable."

**Supplementary Table 9.** Serum level of GT and CREA in LLC*luc*- and Hep55.1c *luc*- bearing mice.

|  | LLC*luc* | | Hep55.1c *luc* | |
| --- | --- | --- | --- | --- |
|  | GT | CREA | GT | CREA |
| Vehicle | <3 | <0.2 | <3 | <0.2 |
| Vehicle | <3 | <0.2 | <3 | <0.2 |
| Vehicle | <3 | <0.2 | <3 | <0.2 |
| UMSCs | <3 | <0.2 | <3 | <0.2 |
| UMSCs | <3 | <0.2 | <3 | <0.2 |
| UMSCs | <3 | <0.2 | <3 | <0.2 |
| UPT | <3 | <0.2 | <3 | <0.2 |
| UPT | <3 | <0.2 | <3 | <0.2 |
| UPT | <3 | <0.2 | <3 | <0.2 |
| UPT+GCV | <3 | <0.2 | <3 | <0.2 |
| UPT+GCV | <3 | <0.2 | <3 | <0.2 |
| UPT+GCV | <3 | <0.2 | <3 | <0.2 |

**Supplementary Table 10.** Statistical analysis of Hep55.1c*luc* tumor luminesce intensity in different UMSCs treatment groups and dates.

| **Hep55.1c*luc*** | | | |
| --- | --- | --- | --- |
| **Tukey's multiple comparisons test** | **Significant** | **Summary** | **Student's t-test**  **Adjusted *p*-Value** |
| **Day -2** | | | |
| Veh vs. UMSCs | No | ns | 0.1049 |
| Veh vs. UPT | No | ns | 0.5000 |
| Veh vs.UPT+G | No | ns | 0.2298 |
| UPT vs. UPT+G | No | ns | 0.2572 |
| **Day 4** | | | |
| Veh vs. UMSCs | No | ns | 0.3539 |
| Veh vs. UPT | Yes | * | 0.0160 |
| Veh vs.UPT+G | Yes | ** | 0.0049 |
| UPT vs. UPT+G | No | ns | 0.0752 |
| **Day 8** | | | |
| Veh vs. UMSCs | No | ns | 0.3031 |
| Veh vs. UPT | No | ns | 0.0583 |
| Veh vs.UPT+G | Yes | * | 0.0182 |
| UPT vs. UPT+G | Yes | ** | 0.0040 |
| **Day 12** | | | |
| Veh vs. UMSCs | No | ns | 0.3371 |
| Veh vs. UPT | Yes | * | 0.0247 |
| Veh vs.UPT+G | Yes | * | 0.0139 |
| UPT vs. UPT+G | Yes | * | 0.0128 |
| **Day 16** | | | |
| Veh vs. UMSCs | No | ns | 0.4089 |
| Veh vs. UPT | Yes | * | 0.0424 |
| Veh vs.UPT+G | Yes | * | 0.0187 |
| UPT vs. UPT+G | Yes | *** | 0.0084 |
| **Day 20** | | | |
| Veh vs. UMSCs | Yes | * | 0.0204 |
| Veh vs. UPT | Yes | **** | <0.0001 |
| Veh vs.UPT+G | Yes | **** | <0.0001 |
| UPT vs. UPT+G | Yes | *** | 0.0004 |
